1 Classification: Biophysics and Computational Biology; Microbiology

2 **Intracellular absorption underlies collective bacterial tolerance towards an**  
3 **antimicrobial peptide**

4 Fan Wu and Cheemeng Tan\*

5 Department of Biomedical Engineering, University of California Davis, Davis, CA, 95616 USA

6 \*Correspondence: [cmtan@ucdavis.edu](mailto:cmtan@ucdavis.edu)

7 **Abstract**

8           The collective tolerance towards antimicrobial peptides (APs) is thought to occur  
9 primarily through mechanisms associated with live bacterial cells. In contrast to the focus on live  
10 cells, we discover that the LL37 antimicrobial peptide kills *Escherichia coli*, forming a  
11 subpopulation of dead cells that absorbs the remaining LL37 into its intracellular space.  
12 Combining mathematical modeling with population and single-cell experiments, we show that  
13 bacteria absorb LL37 at a timing that coincides with the permeabilization of their cytoplasmic  
14 membranes. Furthermore, we show that one bacterial strain can absorb LL37 and protect another  
15 strain from killing by LL37. Finally, we demonstrate that the intracellular absorption of LL37  
16 can be reduced using a peptide adjuvant. In contrast to the existing collective tolerance  
17 mechanisms, we show that the dead-bacterial absorption of APs is a dynamic process that leads  
18 to emergent population behavior, and the work suggests new directions to enhance the efficacy  
19 of APs.

## 20 **Introduction**

21           Antimicrobial peptides (APs) are small peptides (normally less than 10kDa) that counter  
22 bacterial pathogens in host innate immune systems (Cole & Nizet, 2016; Nizet et al., 2001) and  
23 are being developed as new sources of antibacterial agents (Gordon, Romanowski, &  
24 McDermott, 2005; Hancock & Sahl, 2006). Major efforts in the field have focused on interaction  
25 dynamics between APs and bacterial components. For instance, after the initial contact to  
26 bacterial membranes driven by the cationic domain of APs, the hydrophobic domain of APs  
27 facilitates the insertion of APs into lipid bilayers, leading to membrane permeabilization and cell  
28 death (Nguyen, Haney, & Vogel, 2011; Teixeira, Feio, & Bastos, 2012). Previous studies have  
29 also shown that some APs can target DNA (Hsu et al., 2005; Podda et al., 2006) and intracellular  
30 proteins (Kragol et al., 2001; Otvos, Snyder, Condie, Bulet, & Wade, 2005). However, beyond  
31 the direct interaction between APs and bacterial targets, APs can be tolerated by certain bacterial  
32 species through collective mechanisms. The collective tolerance mechanisms are relatively well-  
33 studied for classical antibiotics (Meredith, Srimani, Lee, Lopatkin, & You, 2015; Vega & Gore,  
34 2014) when compared to antimicrobial peptides, and their implication on antibiotic treatment is  
35 well demonstrated in the literature (Chait, Palmer, Yelin, & Kishony, 2016; Hol, Hubert, Dekker,  
36 & Keymer, 2016; Vega, Allison, Samuels, Klempner, & Collins, 2013; Yurtsev, Chao, Datta,  
37 Artemova, & Gore, 2013). For antimicrobial peptides, bacteria may exhibit collective tolerance  
38 through mechanisms such as membrane-displayed proteases that degrade APs (Johansson et al.,  
39 2008; Schmidtchen, Frick, Andersson, Tapper, & Bjorck, 2002; Sieprawska-Lupa et al., 2004)  
40 and secreted molecules including lipids, vesicles, and proteins that titrate APs (Campos et al.,  
41 2004; Cole et al., 2010; Frick, Åkesson, Rasmussen, Schmidtchen, & Björck, 2003; Spinoso et  
42 al., 2007). The titration mechanism occurs due to electrostatic interactions between cationic APs  
43 and negatively-charged molecules or surfaces (Bucki, Byfield, & Janmey, 2007; Frick et al.,  
44 2003; Llobet, Tomas, & Bengoechea, 2008; Starr, He, & Wimley, 2016; Weiner, Bucki, &  
45 Janmey, 2003).

46           To understand collective tolerance caused by the titration mechanism, it is necessary to  
47 first track the localization and distribution of APs in a bacterial population. However, previous  
48 results have been contradictory because the minimum inhibitory concentration (MIC) of APs is  
49 at least two-log folds higher than the amount necessary to kill a single bacterium, suggesting an  
50 unknown titration source. Through fluorescence spectroscopy of the AP PMAP-23, it is found

51 that bacteria are killed when the AP molecules saturate the total surface area of bacterial  
52 membranes with  $10^6$ - $10^7$  peptides per cell (Roversi et al., 2014). Instead, another study has  
53 shown that MIC of AP Pexiganan requires  $\sim 10^9$  peptides per cell (Jepson, Schwarz-Linek, Ryan,  
54 Ryadnov, & Poon, 2016), which is much higher than the necessary amount of AP to saturate the  
55 surface area of a single bacterium (Jepson et al., 2016; Wimley, 2010). In addition, if the  
56 membrane of live cells is the only titration source of APs, MIC of bacteria must increase linearly  
57 with the inoculum size. This expectation has also been proven wrong in the literature (Jepson et  
58 al., 2016). What is the hidden factor that contributes significantly to the titration of AP in a  
59 bacterial population that does not exhibit any of the known tolerance mechanisms (i.e., lipid  
60 shedding and protease display)? Answers to the question may lead to a new explanation of  
61 collective tolerance dynamics during AP treatment and innovative methods to enhance the  
62 efficacy of APs.

63         Instead of focusing on live bacterial cells following current thoughts in the field, we find  
64 that dead bacterial cells can serve as a major titration source of an AP. We discover that LL37,  
65 which is a cathelicidin family AP from human, permeabilizes cytoplasmic membranes of a  
66 subpopulation of bacteria (*Escherichia coli*), which then absorbs LL37 into its intracellular  
67 space. The titration of LL37 by permeabilized bacteria forms a negative feedback response to  
68 LL37 treatment, generating emergent collective tolerance dynamics that cannot be predicted  
69 without the AP-absorption mechanism. Specifically, we track the dynamics of LL37 in bacterial  
70 populations using both single-cell and population measurements based on previous work  
71 (Fantner, Barbero, Gray, & Belcher, 2010; Sochacki, Barns, Bucki, & Weisshaar, 2011). We first  
72 rule out existing AP-tolerance mechanisms in our model system, including the modification of  
73 bacterial surface charge (Fabretti et al., 2006; Guo et al., 1998; Kovacs et al., 2006; Poyart et al.,  
74 2003; Starner, Swords, Apicella, & McCray, 2002), the inactivation of APs by surface shielding  
75 (Campos et al., 2004; Cole et al., 2010; Spinoso et al., 2007), and the cleavage of LL37  
76 (Johansson et al., 2008; Schmidtchen et al., 2002; Sieprawska-Lupa et al., 2004). Next, we show  
77 that the amount of free LL37 in the bacterial culture is reduced through bacterial absorption,  
78 which allows a subpopulation of *E. coli* to grow and repopulate the culture. We also present  
79 single-cell data and perturbation experiments that confirm the AP-absorption mechanism.  
80 Furthermore, we demonstrate that the AP-absorption leads to emergent cross-bacterial-strain  
81 protection against LL37. To illustrate the importance of understanding the AP-absorption

82 mechanism, we show that a peptide adjuvant can be supplemented to reduce the absorption of  
83 APs. The AP-absorption mechanism may be generalizable to other bacterial species and APs,  
84 and it may be considered in the new design of AP-treatment that enhances the efficacy of APs.

## 85 **Results**

### 86 **Bacterial population recovers from initial killing by LL37 through a non-heritable** 87 **mechanism**

88 To establish the experimental conditions for our study, we first investigate real-time  
89 growth dynamics of *E. coli* under LL37 treatment. The *E. coli* BL21PRO strain expresses *lux*  
90 genes (BP-*lux*), leading to luminescence that is tracked as a surrogate of bacterial viability using  
91 a platereader (Yeh, Tschumi, & Kishony, 2006). Luminescence intensity is widely used to report  
92 bacterial metabolic state under antimicrobial treatment because it exhibits higher sensitivity and  
93 larger dynamic range than optical density (Bjarnason, Southward, & Surette, 2003; Kishony &  
94 Leibler, 2003; Yeh et al., 2006). For this experiment, we initiate cultures using the M9 medium  
95 with  $\sim 10^3$ - $10^4$  CFU/ $\mu$ l of bacteria (See pre-growth protocol 1 in Methods Section M1) and  
96 measure their growth dynamics in a 96-well plate supplemented with 2-fold dilutions of LL37  
97 using a platereader for at least 14 hours (See Methods Section M2). In typical antibiotic tests  
98 using batch cultures, bacteria would either grow or be inhibited by the antibiotic for at least 24  
99 hours before the emergence of resistant mutants (Tan et al., 2012). Instead, for LL37, we find  
100 that bacterial populations are inhibited (decline in luminescence intensity) by LL37 at 6.75 $\mu$ g/ml  
101 (Fig. 1a, black dash line) in the first six to eight hours, after which they re-grow at the same rate  
102 as the untreated bacteria (Fig. 1a, black line). We confirm this trend using CFU of the bacteria  
103 (Fig. S1). The recovery dynamic does not occur with LL37 at 13.5 $\mu$ g/ml within the experimental  
104 duration (Fig. 1a, grey line). To validate the mode of actions of LL37, we treat wild-type  
105 BL21PRO (WT-BP) with 13.5 $\mu$ g/ml LL37 for 2 hours. We find strong signals of  
106 phosphatidylserine (PS) exposure (Fig. 1c and Fig. S2a) and propidium iodide (PI) staining (Fig.  
107 1d and Fig. S2b), which have been used as markers for bactericidal antibiotics (Dwyer,  
108 Camacho, Kohanski, Callura, & Collins, 2012), and cell permeabilization and death (Davey &  
109 Hexley, 2011) in previous studies. Unless otherwise noted, we use the intermediate  
110 concentrations (i.e., sub-MIC) of LL37 that allow bacterial recovery to reveal the unknown  
111 collective tolerance mechanism. The use of sub-MIC concentrations is well accepted in the study  
112 of tolerance mechanisms (Müller et al., 2016; Pader et al., 2017; Tan et al., 2012) because

113 bacterial growth dynamics are sensitive to tolerance mechanisms at sub-MIC, increasing the  
114 feasibility of detecting the tolerance mechanisms. Despite the use of sub-MIC for our study, the  
115 revealed collective tolerance mechanisms will occur at AP concentrations above MIC and  
116 potentially reduce the efficacy of the AP.

117 Before investigating any collective tolerance mechanisms, we calculate the coverage of  
118 the bacterial surface by LL37 at the chosen concentrations. Specifically, we assume that  $10^6$ - $10^7$   
119 LL37 molecules can saturate the surface area of one *E. coli* bacterium according to a previous  
120 study using PMAP-23, because both LL37 and PMAP-23 belong to the cathelicidin family,  
121 exhibit helix conformations (Durr, Sudheendra, & Ramamoorthy, 2006; Orioni et al., 2009), and  
122 have similar estimated area-per-molecule ( $\sim 550 \text{ \AA}^2$  for LL37 (Neville et al., 2006) and  $\sim 400 \text{ \AA}^2$   
123 for PMAP-23 (Orioni et al., 2009)). We note that  $6.75 \mu\text{g/ml}$  LL37 corresponds to  $\sim 1.5 \times 10^{10}$   
124 mole of LL37 molecules (M.W.=4493.3g/mol) in  $100 \mu\text{l}$  culture volume. Therefore, there are  
125 approximately  $10^8$ - $10^9$  LL37 molecules to one inoculated bacterium, which is at least 10-100  
126 fold higher than the amount of antimicrobial peptide required to saturate the surface of a single  
127 bacterium. The calculation suggests that at the sub-MIC concentration, the initial stochasticity of  
128 LL37 binding to bacterial surface is unlikely the only factor that titrates LL37 and contributes to  
129 the bacterial recovery during LL37 treatment.

130 Furthermore, if the amount of LL37 is not sufficient to cover the membrane areas, we  
131 expect to see an increase in the average amount of LL37 bound to bacterial membranes with a  
132 higher dose of LL37. Our flow-cytometry results counteract this argument. To track LL37, we  
133 use rhodamine labeled LL37 (Rh-LL37) that demonstrates antimicrobial activity and generates  
134 similar recovery dynamics of bacteria as unmodified LL37 (Fig. S3a) to treat wild-type *E. coli*  
135 BL21PRO (WT-BP). Previous work and our tests also show that increment of rhodamine  
136 intensity correlates with permeabilization of bacterial cytoplasmic membranes (Sochacki et al.,  
137 2011). We find that the initial distributions of rhodamine intensity in bacterial populations do not  
138 show any difference between Rh-LL37 treatments at two concentrations (one concentration with  
139 bacterial recovery; another concentration without recovery. Fig. S2c). The result implies that the  
140 average amount of Rh-LL37 bound to bacterial membranes remains the same for the Rh-LL37  
141 treatments. The counteracting evidence between the bacterial recovery and over-coverage of  
142 LL37 molecules to bacterial membrane prompts us to investigate if there are any mechanisms

143 that significantly reduce the effective amount of LL37 and govern the population dynamics of  
144 bacteria.

145 We next attempt to rule out a few canonical resistance mechanisms before investigating  
146 collective tolerance mechanisms. We first determine whether the bacterial tolerance to LL37 is  
147 heritable. Specifically, we examine whether mutations may occur in our experiments and lead to  
148 the recovery of the bacterial population. We collect bacteria (BP-lux) that recovered from LL37  
149 treatment at 6.75 $\mu$ g/ml and passage them using fresh M9 medium supplemented with LL37. The  
150 passaged bacteria exhibit the same dynamics as the original bacterial populations (Fig. 1b): the  
151 passaged bacteria exhibit inhibition-then-recovery with 6.75 $\mu$ g/ml LL37, but no recovery with  
152 13.5 $\mu$ g/ml LL37. In addition, real-time supplementation of LL37 during the recovery phase still  
153 inhibits the bacterial growth (Fig. S2d). The results indicate that the bacterial recovery is not due  
154 to random bacterial mutations or heritable resistance towards LL37.

155 Next, we investigate if bacteria recover due to the change of antimicrobial activity of  
156 LL37 in bacterial cultures. To track the activity and localization of LL37, we use LL37  
157 conjugated with rhodamine. Since the conjugation of rhodamine to LL37 reduces its  
158 antimicrobial activity, we use Rh-LL37 at 54 $\mu$ g/ml that leads to similar dynamic as unmodified  
159 LL37 at 13.5 $\mu$ g/ml (Fig. S3a) to treat WT-BP and assess the antimicrobial activity of remaining  
160 Rh-LL37 in bacterial culture using microscopy. Because the results from these experiments are  
161 interpreted by comparing to negative controls, the specific concentrations we used do not impact  
162 the main conclusions of the experiments. To start, we supplement Rh-LL37 to either bacterial  
163 culture (Fig. 1e, left) or fresh medium without bacteria (Fig. 1e, right). Both samples are  
164 incubated at 37°C for 5 hours and spent medium is collected by centrifugation. To assess the  
165 antimicrobial activity of the remaining Rh-LL37 in spent medium, we inoculate fresh bacteria  
166 and monitor the co-localization of Rh-LL37 to the bacterial cells using a wide-field fluorescence  
167 microscope (Fig. 1e). Rh-LL37 that has been exposed to bacteria does not co-localize with the  
168 fresh bacteria (no detectable rhodamine intensity), indicating that the Rh-LL37 either has lost its  
169 activity or has a lower effective amount (Fig. 1f and Fig. S2e). In contrast, Rh-LL37 that has  
170 been incubated in medium without bacteria displays strong rhodamine signal around bacteria  
171 through wide-field microscopy. The results indicate that the Rh-LL37 co-localizes with the fresh  
172 bacterial cells (Fig. 1g and Fig. S2f), suggesting that the Rh-LL37 pre-incubated in medium  
173 without bacteria maintains its antimicrobial activity.

174 To further examine the change of antimicrobial activity of LL37 in bacterial cultures, we  
175 repeat the spent-medium experiments (Fig. 1e) with BP-lux using 13.5 $\mu$ g/ml of unmodified  
176 LL37. To contrast the difference between antimicrobial peptide and conventional antibiotic, we  
177 include negative controls for the AP-tolerance that are treated with 50 $\mu$ g/ml carbenicillin (an  
178 antibiotic that targets bacterial cell wall synthesis). Growth dynamics of fresh inoculated BP-lux  
179 in the spent medium are measured using a platereader. The working concentration of  
180 carbenicillin is determined from dosage curves where bacteria are killed within 3-4 hours (Fig.  
181 S3b). We quantify antimicrobial activity using the area between two growth curves (ABC),  
182 measured using a platereader (Fig. 2a): a higher ABC indicates more effective killing of bacteria  
183 by antibacterial agents. We find that ABC of LL37 pre-exposed to bacteria is lower than that of  
184 LL37 pre-exposed to medium without bacteria. In contrast, ABC of carbenicillin remains the  
185 same with and without pre-exposure to bacteria (Fig. 2b). Altogether, the results suggest a non-  
186 heritable mechanism that reduces LL37's amount or activity in bacteria cultures. In the following  
187 sections, we will use his-tagged LL37 (his-LL37) and Rh-LL37 to treat *E. coli* and assess  
188 whether the free AP molecules are degraded or depleted in bacterial culture.

### 189 **The non-heritable mechanism is not due to degradation of LL37**

190 We study if LL37 loses antimicrobial activity through natural degradation, self-  
191 aggregation, or adhesion to culture chambers (Fig. 2c, ①). To test these possibilities, we pre-  
192 incubate LL37 for 3 hours at 37°C in the M9 medium before inoculating BP-lux and assess its  
193 antimicrobial activity by tracking bacterial luminescence using a platereader. The pre-incubated  
194 LL37 at both 6.75 $\mu$ g/ml and 13.5 $\mu$ g/ml give rise to the same ABC as fresh LL37 (Fig. 2d). As a  
195 control for AP-tolerance, both pre-incubated and fresh carbenicillin generate the same ABC. The  
196 results suggest that LL37 is not deactivated through any passive means within the time-scale of  
197 our experiments.

198 LL37 may be degraded by cytoplasmic contents released from permeabilized bacteria  
199 (Fig. 2c, ②). To test this hypothesis, we use western blotting to investigate if cytoplasmic  
200 contents degrade his-tagged LL37 (his-LL37). To collect cytoplasmic contents, we treat WT-BP  
201 with LL37 at 13.5 $\mu$ g/ml to permeabilize bacterial membranes as previously described (Fig. 1a  
202 and 1d). We then extract spent medium from permeabilized bacteria by centrifugation. The  
203 cytoplasmic contents in the spent medium directly mimic the molecular concentration and  
204 composition in the extracellular environment of a bacterial culture that has undergone LL37



205 treatment. The spent medium is then supplemented with his-LL37 at 37°C for 5 hours or  
206 overnight (Fig. 2e, left). We next compare the relative amount of his-LL37 incubated for 5 hours  
207 and overnight using western blotting to assess its degradation. If cytoplasmic contents degrade  
208 his-LL37, we would expect a reduced intensity of the band for 5 hours or overnight treatment  
209 compared to positive control (fresh his-LL37 at identical concentration). Western blotting does  
210 not show any difference between the band intensities of the 5 hours sample, overnight sample,  
211 and positive control (Fig. 2f-I and Fig. S4a). The result implies that the amount of his-LL37 is  
212 not reduced after either 5 hours or overnight incubation in the spent medium. We note that the  
213 western blotting is capable of distinguishing at least 10-fold decrease in the relative amount of  
214 his-LL37 (Fig. 2f-V and Fig. S4a). We repeat this experiment using whole-cell-extract (WCE)  
215 from *E. coli* BL21PRO instead of spent medium from permeabilized *E. coli*. Again, we find no  
216 degradation of his-LL37 by the WCE (Fig. S4b. SI Methods Section SI-M7). To further explore  
217 the degradation of LL37 by cytoplasmic contents, we assess the antimicrobial activity of Rh-  
218 LL37 after incubation with the spent medium from permeabilized *E. coli* using a microscope  
219 (Fig. S5a). We find that Rh-LL37 still retains its activity after pre-exposure of 5 hours to spent  
220 medium from permeabilized bacteria (Fig. S5c). Therefore, our results suggest that cytoplasmic  
221 contents released from permeabilized bacteria do not degrade LL37.

222 LL37 may also be degraded or sequestered by secreted molecules from live bacteria (Fig.  
223 2c, ③). Here, we collect spent medium from WT-BP without LL37-treatment, which contains  
224 secreted molecules from bacteria. We supplement the spent medium with his-LL37 and compare  
225 its relative concentration after either 5 hours or overnight incubation to a positive control using  
226 western blotting. Again, we observe no difference between the band intensities of 5 hours  
227 sample, overnight sample and positive control (Fig. 2f-II; Fig. S4a), which implies that the  
228 amount of his-LL37 is not decreased by the spent medium. Furthermore, his-LL37 incubated in  
229 the medium without cells is not degraded between 5 hours and overnight, which corroborates  
230 that self-degradation of LL37 does not occur in our system (Fig. 2f-III; Fig. S4a). We also  
231 demonstrate that his-LL37 is still degraded by proteinase K in the reaction condition to rule out  
232 any unintended loss of protease activity in the medium (Fig. 2f-IV). Next, we explore the  
233 antimicrobial activity of Rh-LL37 after incubation with the spent medium from untreated *E. coli*  
234 using a microscope (Fig. S5a). We find that the incubated Rh-LL37 co-localizes with fresh  
235 bacterial cells, indicating that the spent medium from untreated bacterial culture does not

236 diminish the antimicrobial activity of Rh-LL37 (Fig. S5b). Our results suggest that degradation  
237 of LL37 by secreted molecules of bacteria does not occur in our experiments.

### 238 **LL37 is absorbed by permeabilized bacteria**

239 The above results have ruled out the loss of LL37 activity by either active or passive  
240 degradation. To shed light on the unknown mechanism that reduces LL37's antimicrobial  
241 activity, we next investigate the mass balance of LL37 in bacterial cultures. We first incubate  
242 WT-BP with his-LL37 at a fixed concentration overnight. Unmodified LL37 is supplemented to  
243 some samples to facilitate the permeabilization of bacterial cells. Next, we collect the spent  
244 medium by centrifugation, and quantify the relative amount of remaining his-LL37 in the  
245 extracted supernatants by western blotting (Fig. 3a, left). His-LL37 supplemented in medium  
246 with no bacterial cells is quantified as a positive control (Fig. 3a, right). Indeed, the presence of  
247 bacteria (*E. coli* cells +) reduces the band intensities compared to the same condition with no  
248 cells (*E. coli* cells -. Fig. 3b-I, II, III. Fig. S6). Altogether, the findings suggest that the amount of  
249 free LL37 is reduced in the culture medium when LL37 permeabilizes bacteria, and the reduction  
250 is not due to degradation or deactivation of LL37 (Fig. 2c).

251 To further explore the cause of free LL37 depletion in bacterial culture, we track  
252 dynamics of Rh-LL37 at the single bacterium level. *E. coli* BL21AI expresses green fluorescent  
253 proteins (BA-GFP), which are leaked outside of bacteria when their cytoplasmic membranes are  
254 permeabilized (Sochacki et al., 2011) (Fig. 3c). The bacteria are incubated in a culture chamber  
255 at room temperature for 30 minutes to allow their adhesion to the bottom surface of the chamber,  
256 and then supplemented with Rh-LL37 at 54µg/ml. At the 35<sup>th</sup> minute after the supplementation,  
257 all bacterial cells show strong GFP signals. At the 45<sup>th</sup> minute, some bacterial cells exhibit strong  
258 Rh-LL37 signals. 10 minutes later, most bacteria exhibit strong Rh-LL37 signals (Fig. 3c).  
259 Quantification of the GFP and Rh-LL37 dynamics shows that accumulation of Rh-LL37 co-  
260 localized with bacteria coincides with the loss of cytoplasmic GFP (Fig. 3d and Fig. S7). We  
261 observe that the rhodamine intensity does not show measurable fluctuations before the drop of  
262 GFP intensity, suggesting that any binding events of Rh-LL37 (e.g., binding to the outer  
263 membrane and periplasmic space (Sochacki et al., 2011)) before cytoplasmic membrane leakage  
264 may be below the detectable limit of our wide-field microscopy. Furthermore, half-time of  
265 fluorescence signal fluctuations from bacterial cells shows a positive correlation between GFP  
266 and Rh-LL37 (with Pearson correlation coefficient ( $r$ ) of 0.974, Fig. 3e). Altogether, the mass

267 balance of LL37 and the observed LL37 absorption phenomenon suggest that LL37  
268 permeabilizes cytoplasmic membranes of a subpopulation of bacteria, which then absorbs LL37  
269 into their intracellular space, leading to the regrowth of the living bacteria.

270 To link our observations from single-cell measurements to population dynamics, we  
271 perform flow cytometry to track the fates of *E. coli* BL21PRO expressing GFP (BP-GFP) under  
272 Rh-LL37 treatment. Specifically,  $\sim 10^3$  CFU/ $\mu$ l of BP-GFP (See pre-growth protocol 2 in  
273 Methods Section M1) is treated with Rh-LL37 at 27 $\mu$ g/ml for several durations and subjected to  
274 flow cytometry. We set one threshold for GFP intensity based on the negative controls (WT-BP)  
275 that do not express GFP (Fig. 4a, and Fig. S8 for negative control). For rhodamine intensity, we  
276 first set one threshold to separate the negative control (Rh-, Fig. S8 for negative control) and Rh-  
277 LL37 associated subpopulations (Rh+). We find that the majority ( $\sim 97\%$ ) of the bacterial cells  
278 has high GFP and Rh+ after 5 minutes of treatment. After 30 minutes of treatment, another  
279 subpopulation emerges at higher rhodamine intensity (Fig. 4a). We set another threshold for  
280 rhodamine intensity based on the emergent subpopulation (Rh++). At the 60<sup>th</sup> and 180<sup>th</sup> minutes,  
281 the majority of bacterial cells ( $\sim 99\%$  for both time points) has shifted to Rh++. The results  
282 strongly suggest a dynamic transition of bacterial cell states during Rh-LL37 treatment (i.e., Rh  
283 negative  $\rightarrow$  ①  $\rightarrow$  ②  $\rightarrow$  ③ from Fig. 4a).

284 To better measure the sub-cellular localization of LL37, we treat *E. coli* BP-GFP with  
285 Rh-LL37 for 30 minutes as described above (Fig. 4a) and sort three subpopulations: high GFP,  
286 Rh+ (① in Fig. 4a), high GFP, Rh++ (② in Fig. 4a) and low GFP, Rh++ (③ in Fig. 4a). The  
287 sorted samples are subjected to high-resolution structured illumination microscopy (SIM) to  
288 identify the localization of Rh-LL37 molecules. We find that Rh-LL37 molecules accumulate at  
289 the perimeter of bacterial cells for Rh+ subpopulation (① and Fig. 4b, top), indicated by the  
290 high Rh intensities on bacterial membranes. When the bacterial cells progress to Rh++  
291 subpopulations (② and ③), Rh-LL37 molecules co-localize with intracellular space of bacteria  
292 (Fig. 4b, middle and bottom), indicated by the higher Rh intensities in the cytoplasm than on the  
293 membranes. Furthermore, we note that bacterial population treated with Rh-LL37 at MIC  
294 demonstrates similar bacterial state transition (i.e., the transition from Rh-, Rh+ to Rh++) as the  
295 one treated at sub-MIC, implying that the AP-absorption occurs at concentrations of LL37 above  
296 MIC (Fig. S11c).

297 According to the observations, we propose a phenomenological model to describe the  
298 sequence of events during Rh-LL37 treatment (Fig. 4c). Specifically, we define three states of  
299 bacteria in our model: living (Rh-), binding (Rh+, ①), and absorbing (Rh++, ②, and ③) states.  
300 First, free Rh-LL37 molecules bind to bacterial cells and transfer them from “living” to  
301 “binding” state. We assume the cells can recover at a certain rate from “binding” to “living” state  
302 due to dissociation of bound Rh-LL37. The assumption is used to formulate our mathematical  
303 model (See Method Section M9). Meanwhile, bound Rh-LL37 can further progress towards  
304 permeabilizing bacterial cytoplasmic membrane (transition from “binding” to “absorbing” state).  
305 This event corresponds to the leakage of intracellular contents (reported by GFP, Fig. 3d, and  
306 4a), as well as absorption of free Rh-LL37 molecules. Next, we build a mathematical model to  
307 quantitatively explore the proposed model (See Methods Section M9). Specifically, the  
308 progression of sequential events is governed by several reaction rate constants:  $k_g$  for growth  
309 rate,  $k_{lf}$  and  $k_{lr}$  for forward and reverse transitions between “living” and “binding” states,  $k_{2f}$  for  
310 transition from “binding” to “absorbing” state, and  $k_{ab}$  for AP absorbing rate (Fig. 4c). We  
311 estimate the parameters in our model by fitting to three biological replicates of the flow  
312 cytometry experiments (Fig. 4d, See Methods Section M9). The mathematical model is then  
313 extended to provide insights for population and collective tolerance dynamics of bacteria.

### 314 **The AP-absorption by permeabilized bacteria is perturbed by the presence of another** 315 **bacterial strain and reduced by a peptide adjuvant**

316 Depending on membrane surface charge, lipid composition, intracellular composition and  
317 other factors (Henzler Wildman, Lee, & Ramamoorthy, 2003; Matsuzaki, Sugishita, Fujii, &  
318 Miyajima, 1995), bacterial strains and species may display different kinetics of state transitions  
319 ( $k_{lf}$ ,  $k_{lr}$ ,  $k_{2f}$  from Fig. 4c) and AP absorption ( $k_{ab}$  from Fig. 4c, and  $K_{ab}$  which is half-maximal  
320 constant for absorption). Therefore, if the AP-absorption is true, the growth dynamics of one  
321 bacterial strain may be perturbed by the presence of the second strain during LL37 treatment (①  
322 in Fig. 5a). To start, we first estimate the kinetic parameters of bacterial state transitions and AP  
323 absorption for *E. coli* MG1655 strain that expressing GFP (MG-GFP) following the same  
324 protocol as BP-GFP (See Methods Section M7 and M9 for details). We estimate that MG-GFP  
325 demonstrates faster growth rate (larger  $k_g$ ), as well as faster recovery from “binding” to “living”  
326 state (larger  $k_{lr}$ ) compared to BL21PRO (Fig. 5c). Furthermore, MG-GFP also has faster  
327 permeabilization rate and absorption rate for Rh-LL37 (larger  $k_{2f}$  and  $k_{ab}$ , Fig. 5c). The faster

328 permeabilization and absorption rates of MG-GFP should lead to an earlier emergency of  
329 recovered subpopulation compared to BP-GFP, which is demonstrated in our flow cytometry  
330 results (Fig. S9).

331 Based on the difference in the kinetics, we hypothesize that the recovery of BL21PRO  
332 can be expedited in the presence of MG1655 that has a faster absorption rate (① in Fig. 5a). We  
333 first expand the mathematical model (Eqn. 1) to include MG1655 (Eqn. S1) with the estimated  
334 kinetic parameters (Fig. 5c. Table S1). In the model, two strains compete for common space (See  
335 SI Methods Section SI-M13 for model expansion). Indeed, with the same total bacterial  
336 densities, our simulation shows that recovery time of BL21PRO during LL37 treatment is  
337 accelerated by the presence of MG1655 (red dash line in Fig. 5e). To test our hypothesis, we mix  
338 BP-lux and wild-type MG1655 (WT-MG) with various CFU ratios and track the recovery of BP-  
339 lux under LL37 treatment at 6.75 $\mu$ g/ml using a platerreader. To better quantify recovery time of  
340 BP-lux, we define a metric named  $t_{\text{half-max}}$ , where the population is recovered to half of its growth  
341 capacity after initial inhibition by an AP (Fig. 5b). We find that for all ratios of the two strains  
342 (BP:MG=100:1, 50:1, 25:1), the recovery of BP-lux is expedited by ~2-3 hours (Fig. 5d and 5e).  
343 Furthermore, the total initial cell density of all mixtures is tightly controlled to be identical (~10<sup>3</sup>  
344 CFU/ $\mu$ l. See pre-growth protocol 2 in Methods Section M1), so that our observations are not  
345 affected by initial bacterial densities. The results corroborate that the AP-absorption forms a  
346 feedback response to the AP, which generates emergent collective tolerance dynamics.

347 LL37 is likely absorbed by several cellular components, such as intracellular DNA and  
348 lipopolysaccharide (LPS) of permeabilized bacteria due to electrostatic attraction (Bucki et al.,  
349 2007). To explore potential perturbations of LL37 absorption, we first supplement ~4ng/ $\mu$ l  
350 plasmid DNA extracted from *E. coli* to BP-lux culture (See pre-growth protocol 1 in Methods  
351 Section M1) under LL37 treatment. Indeed, the recovery time is reduced by ~4-5 hours with  
352 supplementation of exogenous plasmid DNA to LL37 treatment (Fig. S10a), which implies that  
353 the efficacy of LL37 is reduced. Without LL37, bacterial growth is not affected by the  
354 supplemented DNA (Fig. S10b). The results suggest that DNA is one of the intracellular  
355 components that can bind to and absorb LL37, consistent with literature data (Bucki et al., 2007).

356 For an AP and a bacterial strain that exhibit AP-absorption, we speculate that a peptide  
357 can compete with the absorption of the AP by intracellular components, and delay the depletion  
358 of free AP molecules. We use an LPS-binding peptide (LBP) that has been shown to prevent

359 physical interaction between LL37 and LPS (Bucki et al., 2007). Consistent with our  
360 expectation, we find that LBP at 13.5 $\mu$ g/ml delays recovery time of BP-lux (See pre-growth  
361 protocol 1 in Methods Section M1) by ~2 hours compared to no LBP culture under LL37  
362 treatment (Fig. 5f). We note that LBP alone does not inhibit bacterial growth at the tested  
363 concentrations (Fig. S11a). However, LBP displays a concentration-dependent effect. That is,  
364 LBP delays bacterial recovery at high concentration (13.5 $\mu$ g/ml) but expedites it at low  
365 concentration (3.4 $\mu$ g/ml) (Fig. 5f and 5g). Flow cytometry results show that LBP at 13.5 $\mu$ g/ml  
366 delays the transition from “binding” to “absorbing” state (Fig. S11b). The results suggest that  
367 LBP can inhibit both membrane-permeabilization and intracellular absorption of LL37  
368 molecules, which leads to the concentration-dependency effect. We expand the mathematical  
369 model (Eqn. 1) to implement the proposed actions of LBP (Eqn. S2), and the simulation results  
370 agree with our experiments (red dash line in Fig. 5g, and SI Methods Section SI-M13 for model  
371 expansion). The results suggest that peptide adjuvants may be supplemented to APs to reduce or  
372 abolish AP-absorption and enhance the efficacy of APs. Further work using machine learning  
373 approaches may be used to improve the efficacy of the peptide adjuvants in abolishing AP-  
374 absorption (Lee, Fulan, Wong, & Ferguson, 2016; Lee, Wong, & Ferguson, 2017).

## 375 **Discussion**

376 Through a series of deductive experiments, we discover a bacterial collective tolerance  
377 mechanism towards AP, in which LL37 permeabilizes and kills a subpopulation of *E. coli*, which  
378 then absorbs the LL37 into its intracellular space, leading to regrowth of living bacteria. The  
379 collective tolerance can only occur at the population level because the permeabilized and dead  
380 bacteria, in turn, absorb LL37, enhancing the escape of other bacteria in the same population. We  
381 rule out classical resistance mechanisms of bacteria, including bacterial mutation and proteolytic  
382 cleavage of LL37 (Fig. 1 and 2). We also show that short half-life and passive inactivation of  
383 LL37 are not the underlying mechanisms of the LL37-tolerance in our system (Fig. 2d and 2f-  
384 III). Both flow cytometry and single-cell microscopy corroborate the role of AP-absorption, as  
385 well as suggest a phenomenological model for bacterial population dynamics during treatment  
386 (Fig. 3 and Fig. 4). Furthermore, permeabilized bacteria absorb LL37 at both sub-MIC and MIC  
387 concentrations. Facilitated by a mathematical model, we demonstrate cross-bacterial-strain  
388 protection of bacteria against LL37 due to AP-absorption, as well as a potential peptide adjuvant  
389 to tackle the tolerance mechanism (Fig. 5).

390 Furthermore, our findings show that the AP-absorption is a major process that influences  
391 bacterial population dynamics during AP-treatment. For example, if the bacterial recovery (Fig.  
392 1a) is merely due to the growth of some lucky cells that are not bound by AP, the recovery time  
393 should be independent of the presence of a second bacterial strain in the population with a  
394 constant initial-bacterial-density (Fig. 5). Instead, the observed cross-bacterial-strain protection  
395 against LL37 suggests the critical role of AP-absorption in regulating population dynamic during  
396 AP treatment. Furthermore, if the binding of AP to live bacterial membrane is the only factor that  
397 controls population dynamics, the supplementation of LBP should always expedite bacterial  
398 recovery because of competitive binding between LBP and LL37 to bacterial membrane. Instead,  
399 we find that LBP at 13.5 $\mu$ g/ml delays the bacterial recovery, which highlights the critical role of  
400 AP-absorption in governing the population dynamics.

401 The AP-absorption tolerance mechanism may be generalizable to other bacterial species  
402 and APs for a few reasons. First, the absorption of APs likely relies on generic electrostatic  
403 interactions between APs and bacterial components, which are ubiquitous across bacterial  
404 species. However, the kinetic of events leading to AP-absorption likely depends on the  
405 composition of membranes and cytoplasm that control the insertion and transport of  
406 antimicrobial peptides. Second, bacterial permeabilization is a common mechanism-of-action of  
407 a major class of APs. Upon the initial permeabilization, cationic APs may diffuse into cells and  
408 bind to negatively-charged cellular components. Since the electrostatic interaction is not unique  
409 to LL37, other cationic APs are likely to be tolerated by bacteria through the same absorption  
410 mechanism. Indeed, we may investigate the AP-absorption mechanism using similar recovery  
411 dynamics of *E. coli* under the treatment of indolicidin and bac2A (APs originated and derived  
412 from bovine neutrophils) (Fig. S12a and S12b).

413 The discovery of a novel collective tolerance mechanism based on AP-absorption by  
414 dead bacteria spawns a new research area with several open questions. From a qualitative point  
415 of view, intrinsic heterogeneity of bacterial population may cause the stochastic bifurcation of  
416 cell states during treatment (e.g., some bacterial cells are permeabilized faster than others due to  
417 the intrinsic heterogeneity). It is unclear if any genes or proteins are associated with the  
418 heterogeneous behavior during AP treatment, which may be investigated through cell-sorting and  
419 mRNA profiling. In addition, we have used LBP to reduce the AP-absorption and improve the  
420 efficacy of LL37. APs may be sequestered by multiple negatively-charged bacterial components

421 including DNA, peptidoglycan (Sochacki et al., 2011), lipopolysaccharide, and f-actin (Bucki et  
422 al., 2007). Designing adjuvant molecules that compete for AP-absorption may provide a new  
423 way to improve AP efficacy. From a quantitative point of view, AP-absorption is a highly  
424 dynamic process that has the potential to generate emergent dynamics. The kinetics of bacterial  
425 death, AP binding, bacterial recovery from bound AP affect dynamics of AP absorption, which  
426 in turn affect population dynamics under AP treatment. Our study also reveals a negative  
427 feedback loop between an AP and bacteria. Specifically, an AP permeabilizes bacteria and  
428 induce bacterial cell death, but the dead bacterial cells, in turn, absorb AP and diminish the  
429 efficacy of the treatment. Different from previous studies on collective AP-tolerance, the  
430 feedback loop highlights the role of bacterial death on population survival during AP treatment,  
431 which may suggest a new direction towards improving AP efficacy by perturbing the feedback  
432 loop. Furthermore, we have shown that even the same species (*E. coli*), but different strains  
433 (BL21PRO and MG1655) demonstrate different kinetics for AP-absorption, which are sufficient  
434 to generate the cross-bacterial-strain protection against LL37. It remains unclear how APs could  
435 dynamically shape the composition of a multi-species/strains environment under treatment due to  
436 AP-absorption, especially when interactions between species/strains are involved.

#### 437 **Acknowledgements**

438 We appreciate the discussion of the manuscript with members of Tan lab. This work is supported  
439 by Society-in-Science: Branco-Weiss Fellowship to C.T. Cell-sorting is supported by the  
440 National Institutes of Health under award number S10OD018223.

#### 441 **Author contributions**

442 F.W. and C.T. designed the experiments. F.W. performed the experiments and analyzed the  
443 results. All authors wrote the manuscript.

#### 444 **Competing interests**

445 The authors declare no competing financial interests.

446



## 447 **Materials and Methods**

### 448 **Bacterial strains and chemicals (M1)**

449 *Escherichia coli* BL21PRO strain carrying plasmid that constitutively expresses *lux* genes  
450 (BP-*lux*) was used for measurement in a plater reader. Wild-type *E. coli* BL21PRO (WT-BP) and  
451 *E. coli* BL21AI constitutively expressing GFP (BA-GFP) were used for tracking Rh-LL37  
452 dynamics with wide-field microscopy. *E. coli* BL21PRO and MG1655 expressing GFP (BP-GFP  
453 and MG-GFP) were used for flow cytometry and structured illumination microscopy (SIM). All  
454 strains were maintained as glycerol stocks at -80°C for long-term storage or on LB agar plates at  
455 4°C for short-term storage. Bacteria were grown overnight at 37°C in Luria Broth (LB) (VWR)  
456 before experiments. Two pre-growth protocols were used before any treatments to ensure  
457 bacteria cells enter exponential growth phase:

458 Pre-growth protocol 1: Fresh overnight cultures were diluted 1:1,000 into the M9  
459 minimal medium (VWR) supplemented with 0.2% glucose and 0.2% casamino acids without any  
460 antibiotic selection and grown at 37°C on a shaker for 2 hours.

461 Pre-growth protocol 2: Fresh overnight cultures were diluted 1:1,000 into the M9  
462 medium without any antibiotic selection. The cultures were grown at 37°C on a shaker for 3  
463 hours. To better control bacterial cell density, OD600, luminescence or GFP intensity of the pre-  
464 grown cultures was measured, and its CFU/μl was back-calculated according to calibration  
465 curves. The pre-grown cultures were then diluted with M9 to have ~10<sup>3</sup> CFU/μl for later  
466 experiments. CFU was also performed for diluted cultures to check the quality of density control.

467 Unmodified LL37 was purchased from AnaSpec. Rhodamine-conjugated LL37 (Rh-  
468 LL37) was purchased from Rockland. The APs were reconstituted in nanopore water (Thermo  
469 Scientific) before use and stored at -20°C. Six histidine residues were fused to N-terminus of  
470 LL37 (SI Methods Section SI-M4 and Fig. S13). The fused peptide was expressed from a high  
471 copy number plasmid (pET15bL) using BL21DE3. Specifically, 500μl of fresh overnight  
472 BL21DE3/pET15bL-his-LL37 culture was inoculated into 200ml LB medium and incubated at  
473 37°C with 200rpm shaking until it reached exponential growth phase. Next, IPTG was  
474 supplemented at 0.4mM working concentration to induce the expression of his-LL37 for 3 hours.  
475 Bacteria were then harvested using centrifugation (10,000 g, 10 minutes). Each gram (wet  
476 weight) of cell pellets was re-suspended with 5ml of a binding buffer (200mM NaCl and 25mM

477 Tris-HCl in water). We then lysed bacteria through sonication (QSonica Q125, 67% amplitude; 8  
478 cycles of 15 seconds “ON” and 45 seconds “OFF”), and collected cytoplasmic contents through  
479 high-speed centrifugation (25,000 g, 1 hour). His-tag labeled LL37 was purified with nickel  
480 column (Fisher Scientific) and stored at -20°C for future experiments (SI Methods Section SI-  
481 M5). Carbenicillin was purchased from Sigma.

482 LBP was synthesized from Biomatik according to the amino acid sequence obtained from  
483 the previous literature (Araña et al., 2003): RVQGRWKVRKSFFK with FITC linked to N-  
484 terminus. The LBP was reconstituted in nanopore water before use and stored at -20°C.

#### 485 **Measurement of bacterial growth dynamics using a platereader (M2)**

486 BP-lux was grown with pre-growth protocol 1. 100µl of bacterial culture was aliquoted  
487 into each well of a black flat bottom 96-well microplates (Corning Costar). LL37 was  
488 supplemented to the wells at 6.75µg/ml or 13.5µg/ml working concentrations (Fig. 1a). Time  
489 series of luminescence was measured using Tecan M1000Pro platereader at 37°C with shaking  
490 (orbital, 20s every min). Parameters for luminescence measurement were automatic attenuation  
491 and 1,000ms integration time.

492 To test for bacterial mutation (Fig. 1b), BP-lux was treated with LL37 at 6.75µg/ml, and  
493 luminescence was tracked in the platereader as described above. When a bacterial population  
494 started to recover (~7 hours after treatment), 50µl of the bacterial culture was extracted from the  
495 wells and added into 3ml of LB medium without any antibiotic selection to initiate a new  
496 overnight culture. The new overnight culture was then treated with LL37 again following the  
497 same protocol as stated above.

#### 498 **Phosphatidylserine (PS) exposure, propidium iodide (PI) staining, and flow cytometry (M3)**

499 Annexin V-FITC Apoptosis detection kit (Sigma) was used to measure PS exposure and  
500 PI straining. Specifically, WT-BP was grown using pre-growth protocol 1. LL37 was added to  
501 the culture at 13.5µg/ml working concentration. After 2 hours of LL37 treatment, 1ml of culture  
502 was collected and centrifuged at 10,000 g for 10 minutes. Cell pellets were re-suspended with  
503 Annexin binding buffer provided in the kit. Annexin V and PI dyes were added as described in  
504 the manual, and samples were incubated in the dark for 30 minutes at room temperature. Stained

505 samples were diluted 1:50 into PBS and flow cytometry was performed using FACScan 5-color  
506 cytometer. Parameter settings of the flow cytometer were: Lasers: 488nm blue and 640nm red;  
507 Detectors: 530-580nm FITC and 627-666nm PI; Voltages: 295 SSC, 551 FITC, and 458 PI.  
508 FCS-SSC gate was created for bacterial cells based on bacteria under no treatment. Around  
509 10,000 events within FCS-SSC gate for bacterial cells were collected for each sample.

#### 510 **Testing of LL37 and carbenicillin in spent medium (M4)**

511 For the platereader assays (Fig. 2b), we treated BP-lux (pre-growth protocol 1) with  
512 either LL37 or carbenicillin and incubated them in 96-well plates. After 3 hours of incubation at  
513 37°C, treated cultures were collected in 1.5ml Eppendorf tubes and centrifuged at 10,000 g for 10  
514 minutes to collect the supernatants. Extracted supernatants were added to 96-well plates, and  
515 inoculated using the fresh overnight culture of BP-lux at 1:50 dilution ratio. Luminescence was  
516 measured in the platereader. Negative controls contained only M9 medium with LL37 or  
517 carbenicillin and were subjected to the same procedure as stated above.

518 For the microscopy assay (Fig. 1e-g), WT-BP (pre-growth protocol 1) was treated with  
519 Rh-LL37 at 54µg/ml in 96-well plates. After 5 hours of incubation at 37°C, treated cultures were  
520 collected in 1.5ml tubes and centrifuged at 10,000 g for 10 minutes. 10µl of pre-grown bacteria  
521 (pre-growth protocol 1) were relocated in microscopic slide chamber (µ-Slide Angiogenesis,  
522 Ibidi) following the supplementation of 20µl of the supernatants. The chamber was incubated at  
523 room temperature for 2 hours. Images were acquired using Nikon Eclipse Ti microscope with  
524 100x objective (Technical Instruments, CA). The settings for microscope filters were: 450-  
525 490nm excitation and 500-550nm emission for GFP; 532-557nm excitation and 570-640nm  
526 emission for rhodamine. The exposure times for both GFP and rhodamine were 100ms.

#### 527 **Platereader and western blotting to study degradation of LL37 (M5)**

528 To test the self-deactivation of LL37 (Fig. 2d), we supplemented LL37 or carbenicillin in  
529 M9 medium without bacteria and incubated them for 3 hours at 37°C on a shaker. The fresh  
530 overnight culture of BP-lux bacteria was then inoculated at 1:50 dilution ratio into the M9  
531 medium with either pre-incubated or fresh drug molecules. Population dynamics of the bacteria  
532 were tracked using the platereader.

533 To examine degradation of LL37 (Fig. 2e and 2f), we treated WT-BP (pre-growth  
534 protocol 1) with or without LL37 at 13.5 $\mu$ g/ml in 96-well plates at 37°C for 4 hours. The  
535 supernatants were then collected by centrifugation (25,000 g, 1 hour). Next, we mixed the  
536 collected supernatants with purified his-LL37 at 1:1 volumetric ratio in PCR tubes. The controls  
537 contained M9 medium, purified his-LL37, or protease K at 1mg/ml (Thermo Scientific). The  
538 samples were incubated at 37°C for either 5 hours or overnight and subjected to western blotting  
539 with the His-tag antibody (Thermo Scientific). Specifically, samples were run through Mini-  
540 PROTEAN TGX Precast Gel (Bio-Rad) and transferred to nitrocellulose membranes using  
541 Trans-Blot Turbo RTA Nitrocellulose Transfer kit (Bio-Rad). The transferred membranes were  
542 blocked using 5% milk (Biotium) in TBST (1x TBS and 0.1% Tween 20 in water) for 1 hour.  
543 Solutions for western blotting were prepared as follow: primary antibody (6x-His Epitope Tag  
544 Antibody from mouse, Thermo Scientific): 1:3,000 dilution in 3% BSA (in TBST); secondary  
545 antibody (Goat anti-Mouse IgG Secondary Antibody, HRP conjugate, Thermo Scientific):  
546 1:20,000 dilution in 3% BSA (in TBST); washing buffer: 0.2% milk in TBST. The staining  
547 process was performed as follow: incubated in primary antibody for 1.5 hours → washed three  
548 times in washing buffer for 10 minutes each → incubated in secondary antibody for 1 hour →  
549 washed three times in washing buffer for 10 minutes each. Last, HRP on membranes was  
550 detected using Clarity Western ECL Blotting Substrates (Bio-Rad) and PXi gel imager  
551 (Syngene). The incubation and washing for western blotting were all performed at room  
552 temperature on an orbital horizontal shaker. Positive controls (P.C.) were prepared by mixing  
553 his-LL37 and M9 medium at 1:1 volumetric ratio and subjected to western blotting.

554 To investigate depletion of free LL37 in medium (Fig. 3a and 3b), we mixed 10 $\mu$ l of  
555 purified his-LL37 to 10 $\mu$ l of WT-BP (pre-growth protocol 1). Next, we supplemented LL37 at  
556 either 6.75 $\mu$ g/ml or 13.5 $\mu$ g/ml to permeabilize bacteria. The mixtures were incubated at 37°C  
557 overnight in PCR tubes. Supernatants of the cultures were extracted using centrifugation (25,000  
558 g, 1 hour). The negative control contained M9 medium and his-LL37. The collected supernatants  
559 were subjected to western blotting as described above.

## 560 **Tracking dynamics of Rh-LL37 through wide-field fluorescence microscopy (M6)**

561 BA-GFP was pre-grown using protocol 1 supplemented with 0.2% arabinose to induce  
562 expression of GFP. We aliquoted 30 $\mu$ l of bacterial culture to a slide chamber and allowed the

563 cells to settle down for 30 minutes at room temperature. Next, we added Rh-LL37 at 54 $\mu$ g/ml  
564 working concentration to the chamber. Images were recorded every 1 minute with the 100x  
565 objective for 1 hour. The microscope settings were the same as stated above. Microscope images  
566 were analyzed using ImageJ. Specifically, bacterial cells that were visualized throughout all time  
567 points were selected. Integrated intensities of rhodamine and GFP at different time points were  
568 quantified for each selected bacterium and input into MATLAB to generate Figure 3d&e.

### 569 **Tracking transitions of bacteria states during Rh-LL37 treatment using flow cytometry** 570 **(M7)**

571 BP-GFP and MG-GFP were pre-grown following pre-growth protocol 2 supplemented  
572 with 0.4mM IPTG to induce expression of GFP. The initial cell density for this experiment was  
573 well controlled so that we could compare quantitative results across two strains. 100 $\mu$ l of pre-  
574 grown culture was aliquoted in 96-well plate, and Rh-LL37 was supplemented at 27 $\mu$ g/ml. The  
575 samples were incubated in platereader at 37°C with same shaking protocol as described before.  
576 At specific time points, the samples were added to 1ml of 4% PFA and stored on ice before flow  
577 cytometry. Bacteria with no Rh-LL37 treatment was included as a control to gate-out noise  
578 signal based on FSC and SSC. WT-BP and WT-MG were included for negative controls of GFP  
579 intensity. Flow cytometry was performed on Thermo Fisher Attune NxT flow cytometer. At least  
580 20,000 events within FSC-SSC gate for bacterial cells were collected.

### 581 **Bacteria cell-sorting and structured illumination microscopy (SIM) (M8)**

582 BP-GFP treated with Rh-LL37 at 27 $\mu$ g/ml was prepared as described for the flow  
583 cytometry experiment. Samples were collected after 30min of treatment and diluted in 4% PFA.  
584 Cell sorting was performed using Beckman Coulter MoFlo Astrios Cell Sorter at UC Davis Flow  
585 cytometry Core Facility. BP-GFP with no treatment was run through cell sorter first to gate-out  
586 noise based on FSC and SSC and create thresholds for GFP negative and Rh negative. Next, the  
587 threshold to separate Rh<sup>+</sup> and Rh<sup>++</sup> was set based on grouping of subpopulations (See Fig. 4a  
588 for example). Bacterial cells from three representative regions (①, ②, and ③) in Fig. 4a) were  
589 sorted and stored on ice before imaging using SIM.

590 To prepare samples for SIM, 100 $\mu$ l of 2% agarose was melt and dropped on a glass slide.  
591 A cover glass was placed on the top of agarose to flat the surface until it was dry. 10 $\mu$ l of the

592 sorted sample was dropped on the top of agarose and mounted with a cover glass. SIM was  
593 performed using Nikon Structured Illumination “Super-Resolution” microscope equipped with  
594 488nm, 565nm laser lines and 100x objective at UC Davis Microscopy Imaging Facility. Raw  
595 images were acquired with 3D-SIM mode and reconstructed using provided software (Nikon  
596 Elements). Reconstructed images were analyzed using ImageJ (Fig. 4b, left) and MATLAB (Fig.  
597 4b, right). To obtain the heat-map of Rh-LL37 localization (Fig. 4b, right), each image was  
598 imported to MATLAB and normalized with the highest intensity in the image.

### 599 **Mathematical model and parameter estimation using flow cytometry data (M9)**

600 We construed a deterministic model using a system of ordinary differential equations  
601 (ODE) to explore the population dynamics of single bacterial strain under LL37 treatment (Eqn.  
602 1).

$$603 \frac{dA}{dt} = k_g \cdot A \cdot \left(1 - \frac{A}{cap}\right) - k_{1f} \cdot A \cdot \frac{AP_{free}}{(K_{1f} + AP_{free})} + k_{1r} \cdot A_{bind}$$

$$604 \frac{dA_{bind}}{dt} = k_{1f} \cdot A \cdot \frac{AP_{free}}{(K_{1f} + AP_{free})} - k_{1r} \cdot A_{bind} - k_{2f} \cdot A_{bind} \quad (\text{Eqn. 1})$$

$$605 \frac{dA_{absorb}}{dt} = k_{2f} \cdot A_{bind}$$

$$606 \frac{dAP_{free}}{dt} = -k_{ab} \cdot A_{absorb} \cdot \frac{AP_{free}}{(K_{ab} + AP_{free})} - r \cdot \frac{dA_{bind}}{dt}$$

607 Here, A represented bacteria that were not affected by LL37 (living population);  $A_{bind}$   
608 represented bacteria that had LL37 bound to their perimeters (binding population);  $A_{absorb}$   
609 represented bacteria that had been permeabilized and were absorbing free LL37 molecules  
610 (absorbing population).  $AP_{free}$  was free LL37 molecules in the medium. Five reaction rate  
611 constants were  $k_g$ ,  $k_{1f}$ ,  $k_{1r}$ ,  $k_{2f}$  with a unit of  $[\text{min}]^{-1}$ , and  $k_{ab}$  with a unit of  $[\mu\text{g/ml}][\text{min}]^{-1}$   
612  $[\text{CFU/nl}]^{-1}$ .  $K_{1f}$  and  $K_{ab}$  were half-maximum constants with a unit of  $[\mu\text{g/ml}]$ .  $r$  was the  
613 proportional coefficient between  $A_{bind}$  and bound LL37 molecules with a unit of  
614  $[\mu\text{g/ml}][\text{CFU/nl}]^{-1}$ . We set  $r=0.05$ , which corresponded to roughly  $6.7 \times 10^6$  LL37 molecules to  
615 one bacterium, based on the saturation level of the AP PMAP-23 on the bacterial membrane  
616 (Roversi et al., 2014).  $K_{1f}$  was approximated to be  $45 \mu\text{g/ml}$  (roughly equal to  $10 \mu\text{M}$ ) using  
617 apparent dissociation constant of LL37 on bio-membrane (Sood, Domanov, Pietiainen, Kontinen,  
618 & Kinnunen, 2008). The growth rate of A was governed by  $k_g$ , and had a capacity of  $cap=100$

619 (corresponding to ~100 fold changes from initial density to growth capacity from Fig. 1a).  $k_g$   
620 was estimated to be 0.022 for BL21PRO or 0.04 for MG1655 so that the culture took ~6-7 hours  
621 for BL21PRO or ~3-4 hours for MG1655 to reach its capacity, which was similar to our  
622 experimental results with pre-growth protocol 2 (Fig. S14). Forward and reverse transitions  
623 between A and  $A_{bind}$  were represented using  $k_{1f} \cdot A \cdot \frac{AP_{free}}{(K_{1f} + AP_{free})}$  and  $k_{1r} \cdot A_{bind}$  respectively.  
624 Permeabilization of  $A_{bind}$  was governed by  $k_{2f}$ .  $AP_{free}$  could be depleted from medium through  
625 either the absorption ( $k_{ab} \cdot A_{absorb} \cdot \frac{AP_{free}}{(K_{ab} + AP_{free})}$ ) or binding to bacterial membrane ( $r \cdot \frac{dA_{bind}}{dt}$ ). The  
626 depletion of free LL37 molecules through binding was directly proportional to  $A_{bind}$ .

627 To estimate kinetic parameters, we first extracted ratio of each subpopulation from flow  
628 cytometry data of BP-GFP and MG-GFP under Rh-LL37 treatment. Specifically, two thresholds  
629 for rhodamine intensity were set as described for samples collected at different time points.  
630 Ratios of Rh-, Rh+, and Rh++ to entire population were recorded and used as experimental data  
631 for parameter estimation. We used MATLAB function *fmincon* to obtain the first estimation  
632 based on our mathematical model (Eqn. 1) using three replicates of flow-cytometry data. The  
633 loss function for *fmincon* calculated the summation of the square difference between simulated  
634 and three replicates of experimental data. Next, parameters were further refined to fit both the  
635 flow cytometry and recovery time measurements (See Table S1 for simulation parameters).

### 636 **Tracking recovery of BP-lux in the presence of WT-MG (M10)**

637 BP-lux and WT-MG were pre-grown following pre-growth protocol 2 to ensure tightly  
638 controlled initial density. Then, two pre-grown cultures were mixed with various volumetric  
639 ratios to create BP:MG=100:1, 50:1, and 25:1 mixtures. 100 $\mu$ l of each mixture was aliquoted in  
640 96-well plate and supplemented with LL37 at 6.75 $\mu$ g/ml. Recovery dynamics of BP-lux were  
641 tracked through luminescence using the platereader.

### 642 **Perturbation of AP-absorption by LBP (M11)**

643 BP-lux was pre-grown following pre-growth protocol 1. 100 $\mu$ l of pre-grown BP-lux was  
644 aliquoted in 96-well plate, and LBP was supplemented at designed concentrations. LL37 was  
645 then added at 6.75 $\mu$ g/ml. Recovery dynamics of BP-lux were again tracked through  
646 luminescence using the platereader.

647 **Statistical test (M12)**

648 All statistical tests were performed using at least six replicates. To compare the means of  
649 two groups, a one-tail t-test was used with  $p < 0.01$ . Pearson correlation coefficient was calculated  
650 to estimate the linear correlation between two variables.



## References

- 651  
652  
653 Araña, M. d. J., Vallespi, M. G., China, G., Vallespi, G. V., Rodriguez-Alonso, I., Garay, H.  
654 E., . . . Reyes, O. (2003). Inhibition of LPS-responses by synthetic peptides derived from  
655 LBP associates with the ability of the peptides to block LBP-LPS interaction. *Journal of*  
656 *Endotoxin Research*, 9(5), 281-291.
- 657 Bjarnason, J., Southward, C. M., & Surette, M. G. (2003). Genomic profiling of iron-responsive  
658 genes in *Salmonella enterica* serovar typhimurium by high-throughput screening of a  
659 random promoter library. *J Bacteriol*, 185(16), 4973-4982.
- 660 Bucki, R., Byfield, F. J., & Janmey, P. A. (2007). Release of the antimicrobial peptide LL-37  
661 from DNA/F-actin bundles in cystic fibrosis sputum. *Eur Respir J*, 29(4), 624-632.  
662 doi:10.1183/09031936.00080806
- 663 Campos, M. A., Vargas, M. A., Regueiro, V., Llompert, C. M., Alberti, S., & Bengoechea, J. A.  
664 (2004). Capsule polysaccharide mediates bacterial resistance to antimicrobial peptides.  
665 *Infect Immun*, 72(12), 7107-7114. doi:10.1128/IAI.72.12.7107-7114.2004
- 666 Chait, R., Palmer, A. C., Yelin, I., & Kishony, R. (2016). Pervasive selection for and against  
667 antibiotic resistance in inhomogeneous multistress environments. *Nature*  
668 *communications*, 7, 10333.
- 669 Cole, J. N., & Nizet, V. (2016). Bacterial Evasion of Host Antimicrobial Peptide Defenses.  
670 *Microbiol Spectr*, 4(1). doi:10.1128/microbiolspec.VMBF-0006-2015
- 671 Cole, J. N., Pence, M. A., von Kockritz-Blickwede, M., Hollands, A., Gallo, R. L., Walker, M.  
672 J., & Nizet, V. (2010). M protein and hyaluronic acid capsule are essential for in vivo  
673 selection of covRS mutations characteristic of invasive serotype MIT1 group A  
674 *Streptococcus*. *MBio*, 1(4). doi:10.1128/mBio.00191-10
- 675 Davey, H. M., & Hexley, P. (2011). Red but not dead? Membranes of stressed *Saccharomyces*  
676 *cerevisiae* are permeable to propidium iodide. *Environ Microbiol*, 13(1), 163-171.  
677 doi:10.1111/j.1462-2920.2010.02317.x
- 678 Durr, U. H., Sudheendra, U. S., & Ramamoorthy, A. (2006). LL-37, the only human member of  
679 the cathelicidin family of antimicrobial peptides. *Biochim Biophys Acta*, 1758(9), 1408-  
680 1425. doi:10.1016/j.bbamem.2006.03.030
- 681 Dwyer, D. J., Camacho, D. M., Kohanski, M. A., Callura, J. M., & Collins, J. J. (2012).  
682 Antibiotic-induced bacterial cell death exhibits physiological and biochemical hallmarks  
683 of apoptosis. *Mol Cell*, 46(5), 561-572. doi:10.1016/j.molcel.2012.04.027
- 684 Fabretti, F., Theilacker, C., Baldassarri, L., Kaczynski, Z., Kropec, A., Holst, O., & Huebner, J.  
685 (2006). Alanine esters of enterococcal lipoteichoic acid play a role in biofilm formation  
686 and resistance to antimicrobial peptides. *Infect Immun*, 74(7), 4164-4171.  
687 doi:10.1128/IAI.00111-06
- 688 Fantner, G. E., Barbero, R. J., Gray, D. S., & Belcher, A. M. (2010). Kinetics of antimicrobial  
689 peptide activity measured on individual bacterial cells using high-speed atomic force  
690 microscopy. *Nat Nanotechnol*, 5(4), 280-285. doi:10.1038/nnano.2010.29
- 691 Frick, I.-M., Åkesson, P., Rasmussen, M., Schmidtchen, A., & Björck, L. (2003). SIC, a Secreted  
692 Protein of *Streptococcus pyogenes* That Inactivates Antibacterial Peptides. *Journal of*  
693 *Biological Chemistry*, 278(19), 16561-16566.
- 694 Gordon, Y. J., Romanowski, E. G., & McDermott, A. M. (2005). A review of antimicrobial  
695 peptides and their therapeutic potential as anti-infective drugs. *Curr Eye Res*, 30(7), 505-  
696 515. doi:10.1080/02713680590968637

- 697 Guo, L., Lim, K. B., Poduje, C. M., Daniel, M., Gunn, J. S., Hackett, M., & Miller, S. I. (1998).  
698 Lipid A acylation and bacterial resistance against vertebrate antimicrobial peptides. *Cell*,  
699 95(2), 189-198.
- 700 Hancock, R. E., & Sahl, H. G. (2006). Antimicrobial and host-defense peptides as new anti-  
701 infective therapeutic strategies. *Nat Biotechnol*, 24(12), 1551-1557. doi:10.1038/nbt1267
- 702 Henzler Wildman, K. A., Lee, D.-K., & Ramamoorthy, A. (2003). Mechanism of lipid bilayer  
703 disruption by the human antimicrobial peptide, LL-37. *Biochemistry*, 42(21), 6545-6558.
- 704 Hol, F. J., Hubert, B., Dekker, C., & Keymer, J. E. (2016). Density-dependent adaptive  
705 resistance allows swimming bacteria to colonize an antibiotic gradient. *The ISME*  
706 *journal*, 10(1), 30.
- 707 Hsu, C.-H., Chen, C., Jou, M.-L., Lee, A. Y.-L., Lin, Y.-C., Yu, Y.-P., . . . Wu, S.-H. (2005).  
708 Structural and DNA-binding studies on the bovine antimicrobial peptide, indolicidin:  
709 evidence for multiple conformations involved in binding to membranes and DNA.  
710 *Nucleic acids research*, 33(13), 4053-4064.
- 711 Jepson, A. K., Schwarz-Linek, J., Ryan, L., Ryadnov, M. G., & Poon, W. C. K. (2016). What Is  
712 the ‘Minimum Inhibitory Concentration’ (MIC) of Pexiganan Acting on *Escherichia*  
713 *coli*?—A Cautionary Case Study. In M. C. Leake (Ed.), *Biophysics of Infection* (pp. 33-  
714 48). Cham: Springer International Publishing.
- 715 Johansson, L., Thulin, P., Sendi, P., Herten, E., Linder, A., Akesson, P., . . . Norrby-Teglund, A.  
716 (2008). Cathelicidin LL-37 in severe *Streptococcus pyogenes* soft tissue infections in  
717 humans. *Infect Immun*, 76(8), 3399-3404. doi:10.1128/IAI.01392-07
- 718 Kishony, R., & Leibler, S. (2003). Environmental stresses can alleviate the average deleterious  
719 effect of mutations. *J Biol*, 2(2), 14. doi:10.1186/1475-4924-2-14
- 720 Kovacs, M., Halfmann, A., Fedtke, I., Heintz, M., Peschel, A., Vollmer, W., . . . Bruckner, R.  
721 (2006). A functional *dlt* operon, encoding proteins required for incorporation of d-alanine  
722 in teichoic acids in gram-positive bacteria, confers resistance to cationic antimicrobial  
723 peptides in *Streptococcus pneumoniae*. *J Bacteriol*, 188(16), 5797-5805.  
724 doi:10.1128/JB.00336-06
- 725 Kragol, G., Lovas, S., Varadi, G., Condie, B. A., Hoffmann, R., & Otvos, L. (2001). The  
726 antibacterial peptide pyrrolicorin inhibits the ATPase actions of DnaK and prevents  
727 chaperone-assisted protein folding. *Biochemistry*, 40(10), 3016-3026.
- 728 Lee, E. Y., Fulan, B. M., Wong, G. C., & Ferguson, A. L. (2016). Mapping membrane activity in  
729 undiscovered peptide sequence space using machine learning. *Proc Natl Acad Sci U S A*,  
730 113(48), 13588-13593. doi:10.1073/pnas.1609893113
- 731 Lee, E. Y., Wong, G. C. L., & Ferguson, A. L. (2017). Machine learning-enabled discovery and  
732 design of membrane-active peptides. *Bioorg Med Chem*. doi:10.1016/j.bmc.2017.07.012
- 733 Llobet, E., Tomas, J. M., & Bengoechea, J. A. (2008). Capsule polysaccharide is a bacterial  
734 decoy for antimicrobial peptides. *Microbiology*, 154(12), 3877-3886.
- 735 Matsuzaki, K., Sugishita, K., Fujii, N., & Miyajima, K. (1995). Molecular basis for membrane  
736 selectivity of an antimicrobial peptide, magainin 2. *Biochemistry*, 34(10), 3423-3429.
- 737 Meredith, H. R., Srimani, J. K., Lee, A. J., Lopatkin, A. J., & You, L. (2015). Collective  
738 antibiotic tolerance: mechanisms, dynamics and intervention. *Nature chemical biology*,  
739 11(3), 182.
- 740 Müller, A., Wenzel, M., Strahl, H., Grein, F., Saaki, T. N., Kohl, B., . . . Schneider, T. (2016).  
741 Daptomycin inhibits cell envelope synthesis by interfering with fluid membrane

- 742 microdomains. *Proceedings of the National Academy of Sciences*, 113(45), E7077-  
743 E7086.
- 744 Neville, F., Cahuzac, M., Konovalov, O., Ishitsuka, Y., Lee, K. Y. C., Kuzmenko, I., . . .  
745 Gidalevitz, D. (2006). Lipid headgroup discrimination by antimicrobial peptide LL-37:  
746 insight into mechanism of action. *Biophysical journal*, 90(4), 1275-1287.
- 747 Nguyen, L. T., Haney, E. F., & Vogel, H. J. (2011). The expanding scope of antimicrobial  
748 peptide structures and their modes of action. *Trends Biotechnol*, 29(9), 464-472.  
749 doi:10.1016/j.tibtech.2011.05.001
- 750 Nizet, V., Ohtake, T., Lauth, X., Trowbridge, J., Rudisill, J., Dorschner, R. A., . . . Gallo, R. L.  
751 (2001). Innate antimicrobial peptide protects the skin from invasive bacterial infection.  
752 *Nature*, 414(6862), 454-457. doi:10.1038/35106587
- 753 Orioni, B., Bocchinfuso, G., Kim, J. Y., Palleschi, A., Grande, G., Bobone, S., . . . Stella, L.  
754 (2009). Membrane perturbation by the antimicrobial peptide PMAP-23: a fluorescence  
755 and molecular dynamics study. *Biochim Biophys Acta*, 1788(7), 1523-1533.  
756 doi:10.1016/j.bbamem.2009.04.013
- 757 Otvos, L., Snyder, C., Condie, B., Bulet, P., & Wade, J. D. (2005). Chimeric antimicrobial  
758 peptides exhibit multiple modes of action. *International Journal of Peptide Research and*  
759 *Therapeutics*, 11(1), 29-42.
- 760 Pader, V., Hakim, S., Painter, K. L., Wigneshweraraj, S., Clarke, T. B., & Edwards, A. M.  
761 (2017). Staphylococcus aureus inactivates daptomycin by releasing membrane  
762 phospholipids. *Nature microbiology*, 2(1), 16194.
- 763 Podda, E., Benincasa, M., Pacor, S., Micali, F., Mattiuzzo, M., Gennaro, R., & Scocchi, M.  
764 (2006). Dual mode of action of Bac7, a proline-rich antibacterial peptide. *Biochimica et*  
765 *Biophysica Acta (BBA)-General Subjects*, 1760(11), 1732-1740.
- 766 Poyart, C., Pellegrini, E., Marceau, M., Baptista, M., Jaubert, F., Lamy, M. C., & Trieu-Cuot, P.  
767 (2003). Attenuated virulence of Streptococcus agalactiae deficient in D-alanyl-  
768 lipoteichoic acid is due to an increased susceptibility to defensins and phagocytic cells.  
769 *Mol Microbiol*, 49(6), 1615-1625.
- 770 Roversi, D., Luca, V., Aureli, S., Park, Y., Mangoni, M. L., & Stella, L. (2014). How many  
771 antimicrobial peptide molecules kill a bacterium? The case of PMAP-23. *ACS Chem Biol*,  
772 9(9), 2003-2007. doi:10.1021/cb500426r
- 773 Schmidtchen, A., Frick, I. M., Andersson, E., Tapper, H., & Bjorck, L. (2002). Proteinases of  
774 common pathogenic bacteria degrade and inactivate the antibacterial peptide LL-37. *Mol*  
775 *Microbiol*, 46(1), 157-168.
- 776 Sieprawska-Lupa, M., Mydel, P., Krawczyk, K., Wojcik, K., Puklo, M., Lupa, B., . . . Potempa,  
777 J. (2004). Degradation of human antimicrobial peptide LL-37 by Staphylococcus aureus-  
778 derived proteinases. *Antimicrob Agents Chemother*, 48(12), 4673-4679.  
779 doi:10.1128/AAC.48.12.4673-4679.2004
- 780 Sochacki, K. A., Barns, K. J., Bucki, R., & Weisshaar, J. C. (2011). Real-time attack on single  
781 Escherichia coli cells by the human antimicrobial peptide LL-37. *Proc Natl Acad Sci U S*  
782 *A*, 108(16), E77-81. doi:10.1073/pnas.1101130108
- 783 Sood, R., Domanov, Y., Pietiainen, M., Kontinen, V. P., & Kinnunen, P. K. (2008). Binding of  
784 LL-37 to model biomembranes: insight into target vs host cell recognition. *Biochim*  
785 *Biophys Acta*, 1778(4), 983-996. doi:10.1016/j.bbamem.2007.11.016

- 786 Spinosa, M. R., Progida, C., Tala, A., Cogli, L., Alifano, P., & Bucci, C. (2007). The *Neisseria*  
787 meningitidis capsule is important for intracellular survival in human cells. *Infect Immun*,  
788 75(7), 3594-3603. doi:10.1128/IAI.01945-06
- 789 Starner, T. D., Swords, W. E., Apicella, M. A., & McCray, P. B., Jr. (2002). Susceptibility of  
790 nontypeable *Haemophilus influenzae* to human beta-defensins is influenced by  
791 lipooligosaccharide acylation. *Infect Immun*, 70(9), 5287-5289.
- 792 Starr, C. G., He, J., & Wimley, W. C. (2016). Host cell interactions are a significant barrier to the  
793 clinical utility of peptide antibiotics. *ACS Chemical Biology*, 11(12), 3391-3399.
- 794 Tan, C., Smith, R. P., Srimani, J. K., Riccione, K. A., Prasada, S., Kuehn, M., & You, L. (2012).  
795 The inoculum effect and band-pass bacterial response to periodic antibiotic treatment.  
796 *Mol Syst Biol*, 8, 617. doi:10.1038/msb.2012.49
- 797 Teixeira, V., Feio, M. J., & Bastos, M. (2012). Role of lipids in the interaction of antimicrobial  
798 peptides with membranes. *Prog Lipid Res*, 51(2), 149-177.  
799 doi:10.1016/j.plipres.2011.12.005
- 800 Vega, N. M., Allison, K. R., Samuels, A. N., Klempner, M. S., & Collins, J. J. (2013).  
801 *Salmonella typhimurium* intercepts *Escherichia coli* signaling to enhance antibiotic  
802 tolerance. *Proceedings of the National Academy of Sciences*, 110(35), 14420-14425.
- 803 Vega, N. M., & Gore, J. (2014). Collective antibiotic resistance: mechanisms and implications.  
804 *Current opinion in microbiology*, 21, 28-34.
- 805 Weiner, D. J., Bucki, R., & Janmey, P. A. (2003). The antimicrobial activity of the cathelicidin  
806 LL37 is inhibited by F-actin bundles and restored by gelsolin. *American journal of*  
807 *respiratory cell and molecular biology*, 28(6), 738-745.
- 808 Wimley, W. C. (2010). Describing the Mechanism of Antimicrobial Peptide Action with the  
809 Interfacial Activity Model. *ACS Chemical Biology*, 5(10), 905-917.  
810 doi:10.1021/cb1001558
- 811 Yeh, P., Tschumi, A. I., & Kishony, R. (2006). Functional classification of drugs by properties of  
812 their pairwise interactions. *Nat Genet*, 38(4), 489-494. doi:10.1038/ng1755
- 813 Yurtsev, E. A., Chao, H. X., Datta, M. S., Artemova, T., & Gore, J. (2013). Bacterial cheating  
814 drives the population dynamics of cooperative antibiotic resistance plasmids. *Molecular*  
815 *systems biology*, 9(1), 683.

816

**Figure 1**

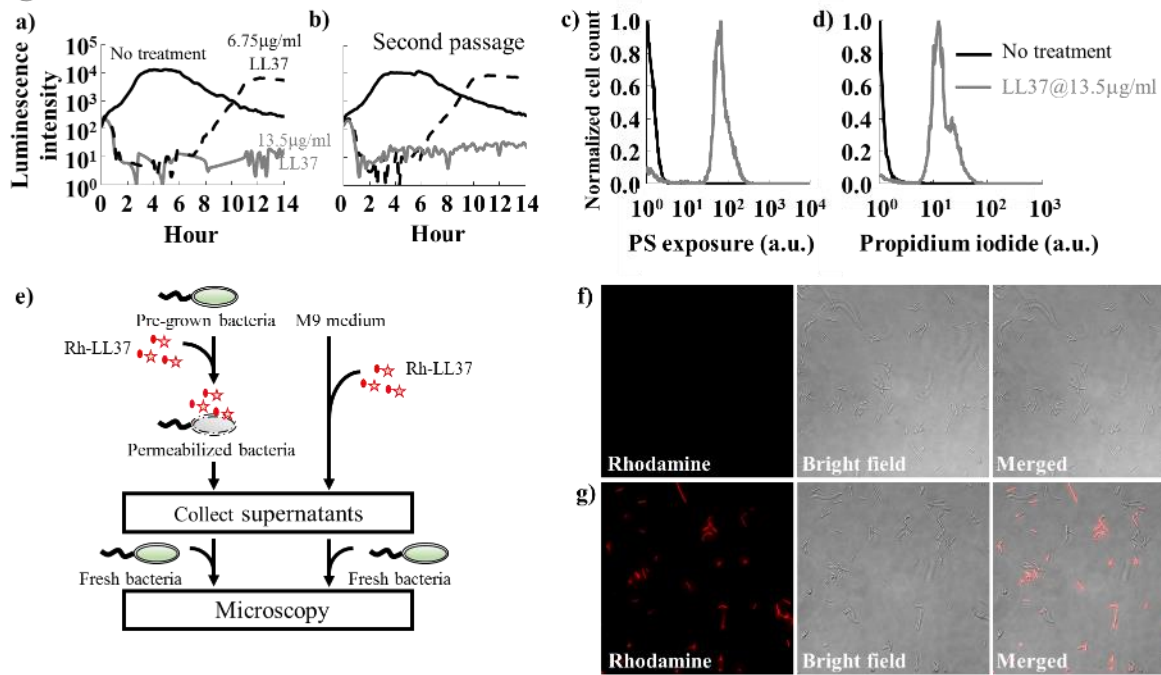

817

**Figure 2**

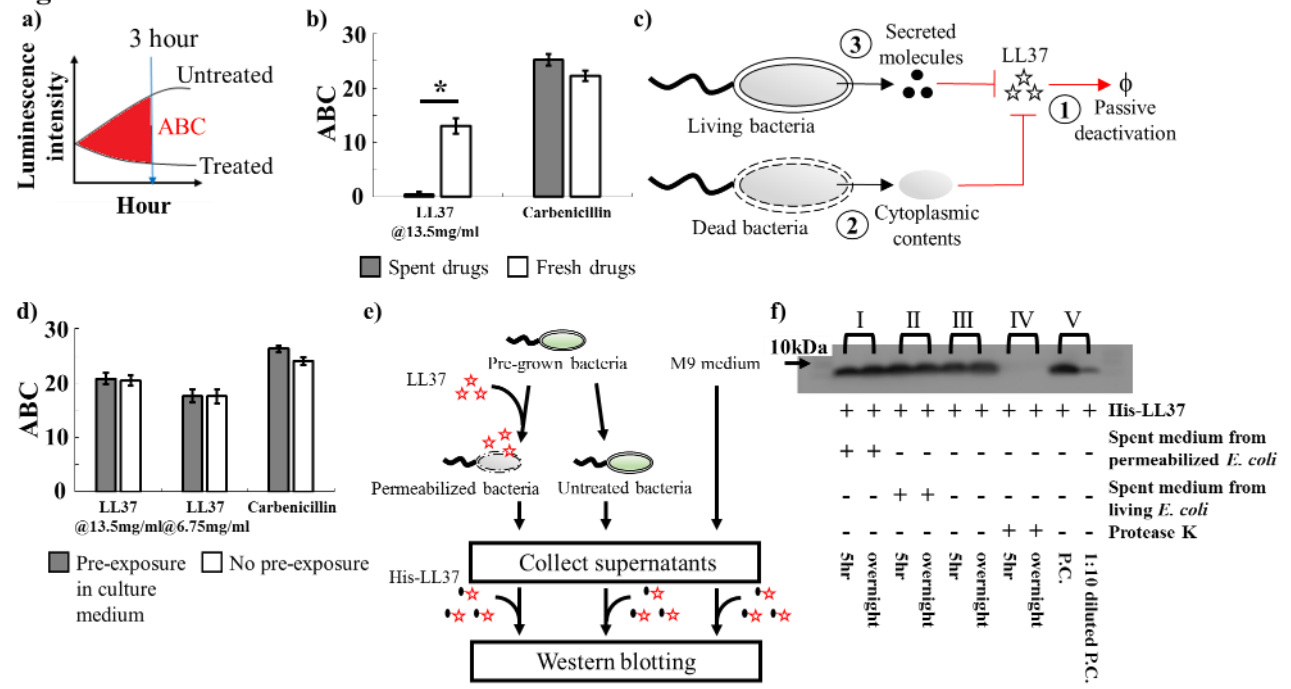

818

**Figure 3**

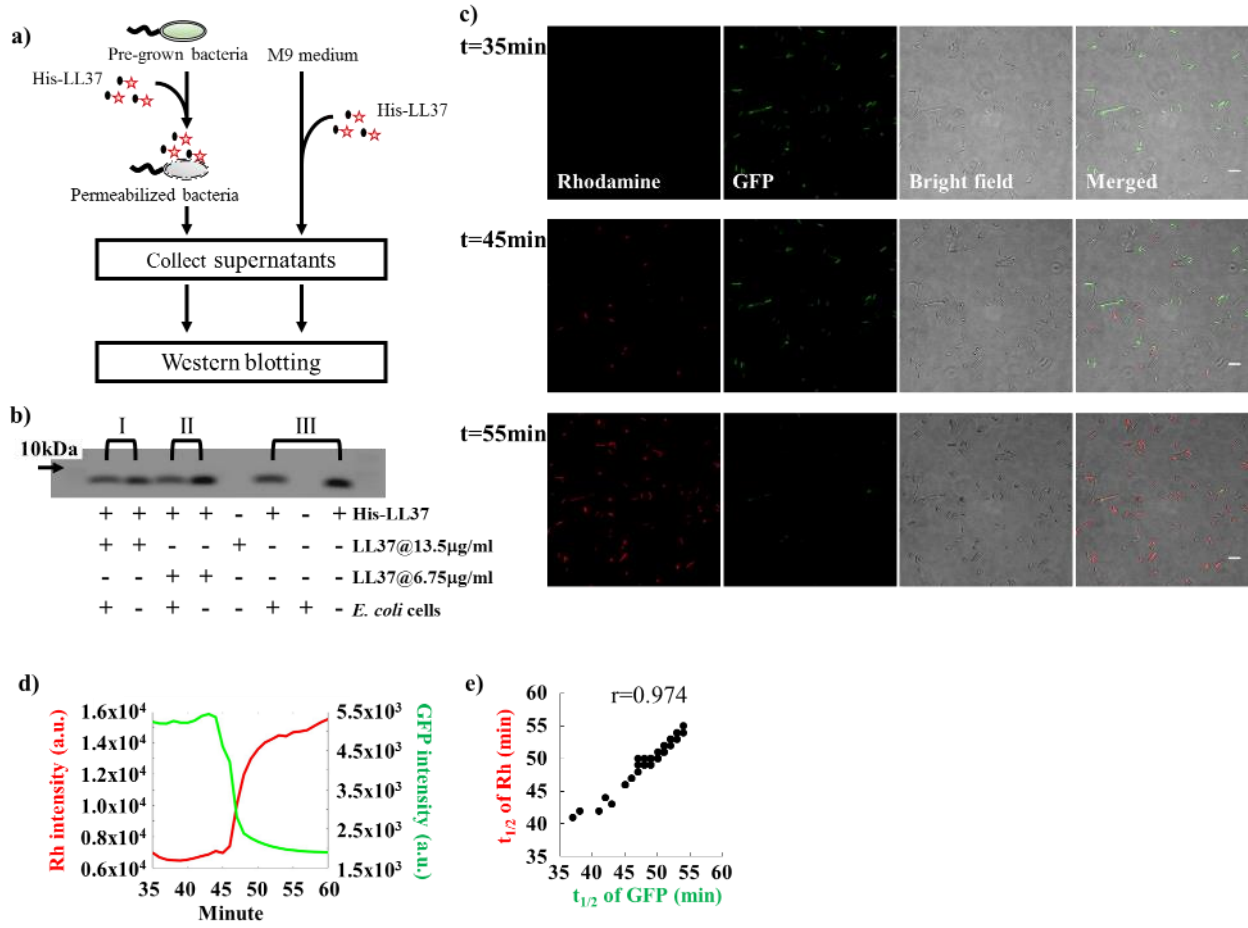

819

820

**Figure 4**

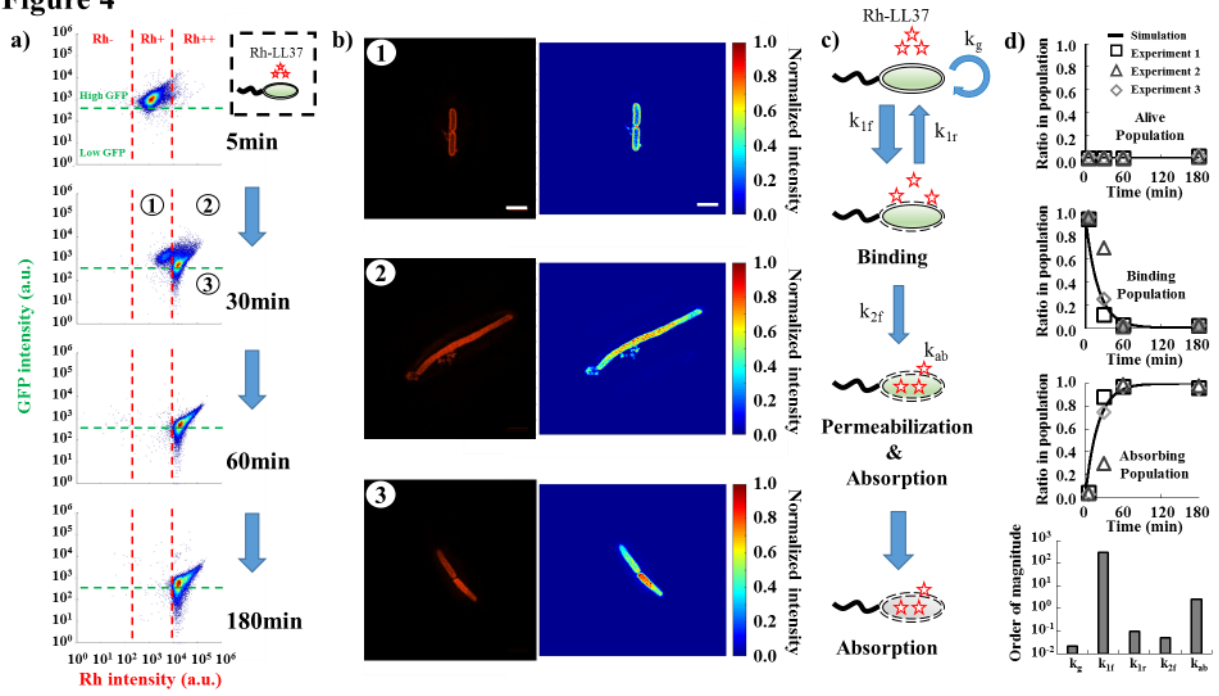

821



**Figure 5**

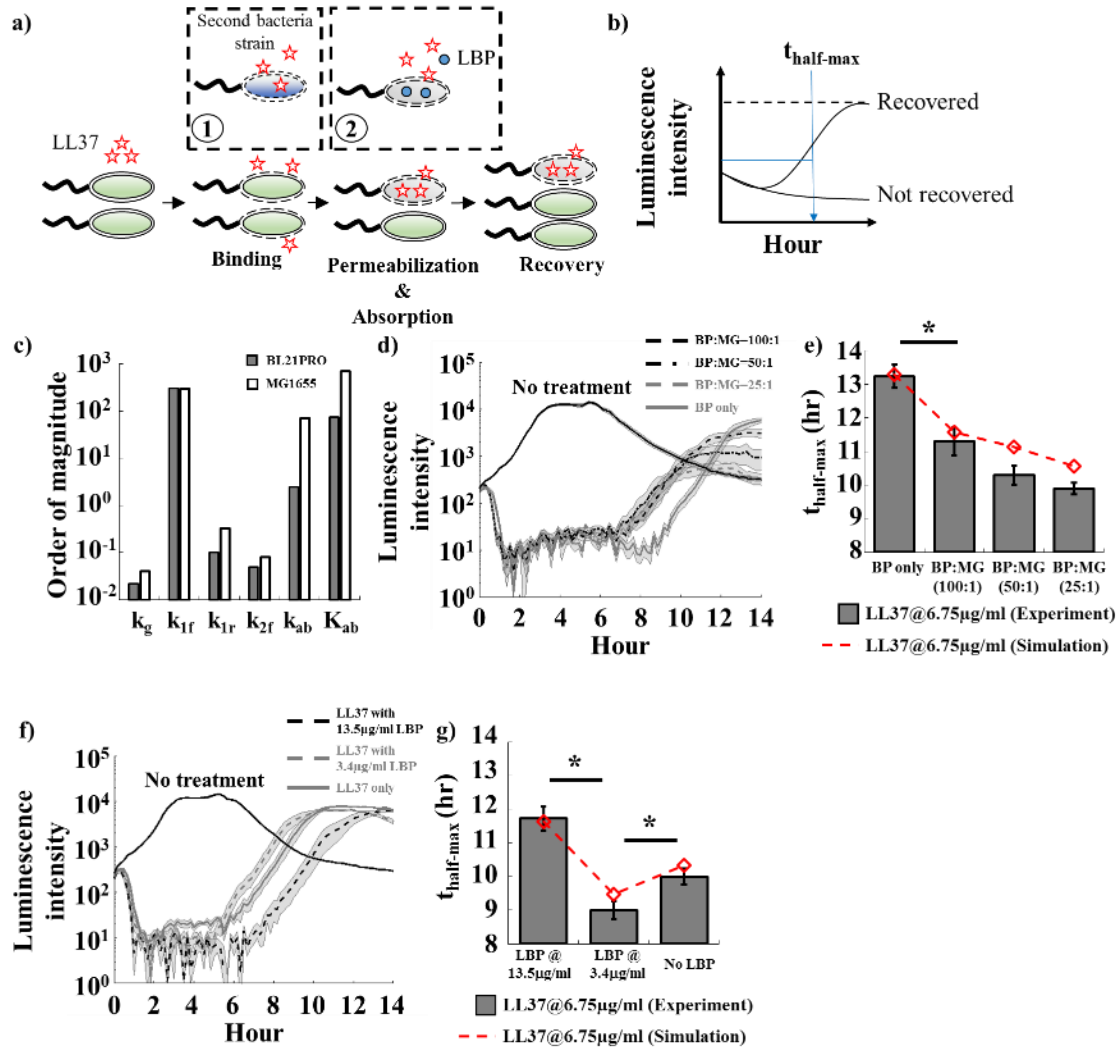

822

823

824 **Figure Legends**

825 **Figure 1. Studying collective tolerance mechanisms using LL37 and *Escherichia coli*.**

826 **a)** Population dynamics of *E. coli* are tracked using their luminescence intensity. Bacteria treated  
827 with LL37 at two concentrations (black dash line and grey line) demonstrate initial killing  
828 (before 6 hours) compared to the one without treatment (black line). However, the bacterial  
829 population treated with 6.75µg/ml of LL37 recovers after around 8 hours. See Methods Section  
830 M2.

831 **b)** Recovered bacteria from LL37 treatment at 6.75µg/ml (Fig. 1a black dash line) is collected  
832 and grown overnight. The second passage of recovered bacteria is treated with LL37 at two  
833 concentrations (black dash line and grey line) following the same protocol as in Fig. 1a. The  
834 second passage of bacteria exhibits similar inhibition-then-recovery dynamics of bacterial  
835 luminescent intensity, suggesting that genetic mutations do not cause the recovery in our system.  
836 See Methods Section M2.

837 **c&d)** LL37 at 13.5µg/ml (grey line in c) leads to phosphatidylserine (PS) exposure, which has  
838 been used as a marker for bactericidal antibiotics, compared to the negative control (black line in  
839 c). Propidium iodide (PI) staining, which has been used to detect bacterial permeabilization and  
840 death, is also observed under the LL37 treatment (grey line in d), but not the negative control  
841 (black line in d). See Methods Section M3.

842 **e)** A flow chart illustrates the experiments (Fig. 1f and 1g) that investigate the loss of Rh-LL37  
843 (red star) activity in the presence of bacteria. Specifically, Rh-LL37 is exposed to bacterial cells  
844 for 5 hours (left). Next, medium and cells are separated using centrifugation. Fresh bacteria are  
845 inoculated into the medium portion, and the antimicrobial activity of Rh-LL37 in the medium  
846 portion is assessed using a wide-field microscope. As a control (right), Rh-LL37 is only  
847 incubated in medium without bacterial cells. See Methods Section M4.

848 **f)** Fresh bacteria inoculated in the spent medium containing Rh-LL37 pre-exposed to bacterial  
849 cells (Fig. 1e, left) do not show any rhodamine signals inside or around the bacteria. The  
850 microscope images suggest that the Rh-LL37 loses its antimicrobial activity after pre-incubation  
851 with bacteria. Scale bar represents 10µm. See Methods Section M4.

852 **g)** As a control (Fig. 1e, right), fresh bacterial cells demonstrate strong rhodamine intensity with  
853 Rh-LL37 pre-incubated in medium without bacteria. It implies that the Rh-LL37 retains its  
854 antimicrobial activity. Scale bar represents 10 $\mu$ m. See Methods Section M4.

855 **Figure 2. The observed bacterial population dynamics are not due to either active or**  
856 **passive degradation of the molecules.**

857 **a)** We define a metric named accumulated area between curves (ABC) to characterize the  
858 antimicrobial activity of drugs. It calculates the accumulated area between treated and untreated  
859 samples. Large ABC implies high antimicrobial activity.  $ABC = \sum_{0hr}^{3hr} (\log_{10} LUM_{non-treated} -$   
860  $\log_{10} LUM_{treated})$ .

861 **b)** To investigate the collective tolerance mechanism, we assess the antimicrobial activity of  
862 LL37 that has been exposed to bacterial cells. Specifically, LL37 is supplemented to the bacterial  
863 culture. Next, the medium and bacterial cells are separated. The spent drug in the medium  
864 portion is collected and re-inoculated with fresh bacteria. LL37 pre-exposed to bacteria loses  
865 antimicrobial activity (left grey bar), whereas LL37 pre-exposed to culture medium without  
866 bacteria retains its antimicrobial activity (left white bar). Carbenicillin maintains its activity after  
867 pre-exposure to bacteria (right bars). Asterisk indicates significant difference ( $p < 0.01$ ), and error  
868 bars are standard error of the mean (SEM) from  $N=6$ . See Methods Section M4.

869 **c)** The schematic shows possible mechanisms that may reduce the antimicrobial activity of LL37  
870 in bacterial culture: ①. Natural degradation or self-aggregation may alter and mask functional  
871 domains of LL37. ②. Permeabilized bacterial cells may release intracellular contents that  
872 degrade or inactivate LL37. ③. Live bacteria may secrete molecules that degrade or inactivate  
873 LL37.

874 **d)** To evaluate natural degradation or self-aggregation of LL37 in medium (①), LL37 and  
875 carbenicillin are supplemented in the medium for 3 hours before inoculation of bacteria (grey  
876 bars). Pre-incubated LL37 does not show a decrease in ABC when compared to fresh LL37. It  
877 implies that natural degradation, self-aggregation, and passive inactivation do not decrease LL37  
878 activity within the experiment time window. Error bars are SEM from  $N=6$ . See Methods Section  
879 M5.

880 e) A flow chart illustrates the experiments that investigate stability (①) of his-LL37 in medium  
881 and the degradation (② and ③) of his-LL37 in spent medium from permeabilized or live  
882 bacteria (Fig. 2f). Specifically, bacterial cells are permeabilized by LL37, and cytoplasmic  
883 contents in the spent medium are collected by centrifugation (left). Secreted molecules are  
884 collected by removing untreated bacteria from the medium (middle). As a control, medium  
885 without cells is included (right). His-LL37 is incubated in the spent medium or fresh medium and  
886 subjected to western blotting. See Methods Section M5.

887 f) Quantification of the relative amount of his-tag labeled LL37 (his-LL37). We treat his-LL37  
888 with the collected spent medium (Fig. 2e) for 5 hours or overnight to assess its degradation. The  
889 relative amount of his-LL37 is quantified using the band intensity from western blotting. His-  
890 LL37 incubated in spent medium from permeabilized bacteria (I) or live bacteria (II) does not  
891 show a reduction of band intensity. Furthermore, the relative amount of his-LL37 does not  
892 change over time in medium without bacteria, which further corroborates that LL37 does not  
893 naturally degrade in the medium (III). Proteinase K retains proteolytic activity in our reaction  
894 condition (IV). Western blotting is sensitive to a 10-fold decrease in the amount of his-LL37 (V).  
895 See replicate of western blotting results in Fig. S4a. See Methods Section M5.

### 896 **Figure 3. The extracellular amount of LL37 decreases in the presence of bacteria**

897 a) A flow chart illustrates the experiments that investigate the conservation of mass during LL37  
898 treatment (Fig. 3b). Bacterial culture (left) or medium without bacteria (right) is supplemented  
899 by His-LL37. Spent medium is collected, and western blotting is used to estimate the amount of  
900 remaining his-LL37 in the medium. See Methods Section M5.

901 b) Western blotting shows that free his-LL37 in bacterial culture is depleted through an unknown  
902 mechanism that does not involve degradation or passive inactivation of LL37 (Fig. 2c). His-  
903 LL37 is supplemented in the bacterial culture with (I, II) and without (III) unmodified LL-37  
904 which permeabilizes bacteria. Supernatants of the cultures are subjected to western blotting. We  
905 find that the band intensities are reduced for the samples with bacteria (*E. coli* cells +) compared  
906 to the samples without bacteria (*E. coli* cell -). See Methods Section M5.

907 c) Single bacterium microscopy shows the accumulation of Rh-LL37 in bacteria. *E. coli*  
908 constitutively expressing green fluorescent proteins (GFP) is treated by Rh-LL37. Scale bar  
909 represents 10 $\mu$ m. See Methods Section M6.

910 d) The representative dynamics of rhodamine and GFP intensity of one bacterium show that the  
911 leakage of GFP from bacterial cytoplasm correlates with the accumulation of Rh-LL37 in  
912 bacterial cells. See additional single-cell dynamics in Fig. S7a and S7b. See Methods Section  
913 M6.

914 e) Single-cell GFP and rhodamine dynamics are analyzed using MATLAB to identify a  
915 correlation between the dynamics. Times to reach half of the maximum changes in GFP and  
916 rhodamine intensities ( $t_{1/2}$ ) are positively correlated. N=54. Methods Section M6.

917 **Figure 4. LL37 is absorbed by permeabilized bacterial cells, and the absorption causes**  
918 **depletion of LL37 in bacterial cultures.**

919 a) Flow cytometry results demonstrate the transition of bacterial states over time during Rh-  
920 LL37 treatment. *E. coli* constitutively expressing green fluorescent proteins (GFP) is treated by  
921 Rh-LL37. Green dash line separates populations with intact (high GFP) and permeabilized (low  
922 GFP) membrane. Rh negative (Rh-) represents bacterial population without Rh-LL37 association  
923 (See Fig. S8 for negative controls). Bacterial cells can transit from “high GFP, Rh positive  
924 (Rh+)” to “high GFP, Rh double positive (Rh++)” over time, and the permeabilization (transition  
925 from high GFP to low GFP) only occurs in Rh++ bacteria. See Methods Section M7.

926 b) Structured illumination microscopy (SIM) reveals co-localization of Rh-LL37, bacterial  
927 membrane, and intracellular space. Bacterial populations are sorted to collect subpopulations  
928 under Rh-LL37 treatment ((1), (2), and (3) from Fig. 4a). SIM images (left) and intensity heat-  
929 maps (right) show that Rh-LL37+ population ((1)) has Rh-LL37 co-localizes at the perimeter of  
930 the cell membrane, whereas Rh-LL37++ population ((2) and (3)) has Rh-LL37 co-localizes at  
931 intracellular space of bacteria. See Fig. S15 for more SIM images. Scale bar represents 10 $\mu$ m.  
932 See Methods Section M8.

933 c) Proposed model for the transition of bacterial states under Rh-LL37 treatment. We propose  
934 three bacterial states to explain the population dynamics: living population, binding population  
935 ((1) from Fig. 4a), and absorbing population ((2) and (3) from Fig. 4a). Kinetics of the

936 transitions between states are governed by three reaction rate constants ( $k_{1f}$ ,  $k_{1r}$ , and  $k_{2f}$ ). The  
937 depletion rate of Rh-LL37 from the medium by absorbing population is governed by  $k_{ab}$ .  
938 Intrinsic bacterial growth has a rate constant of  $k_g$ . See Eqn. 1 and Methods Section M9.

939 **d)** To estimate reaction rate constants of the proposed model, we quantify ratios of each  
940 subpopulation in entire population from flow-cytometry data and estimate the kinetic parameters.  
941 Black lines represent simulation results. Black squares, grey triangles, and grey diamonds  
942 represent data from three replicates. Five reaction rate constants are estimated to be  
943  $k_g=0.022(\text{min}^{-1})$ ,  $k_{1f}=300(\text{min}^{-1})$ ,  $k_{1r}=0.1(\text{min}^{-1})$ ,  $k_{2f}=0.05(\text{min}^{-1})$ , and  $k_{ab}=2.5(\mu\text{g/ml})(\text{min})^{-1}$   
944  $^{1}(\text{CFU/nl})^{-1}$ . See Methods Section M9.

945 **Figure 5. LL37 absorption by dead cells leads to cross-bacterial-strain protection and can**  
946 **be reduced by a peptide adjuvant.**

947 **a)** Schematic shows the perturbations of AP-absorption by another bacteria strain (①) or a  
948 competitive molecule for absorption (②). Specifically, one bacteria strain may have different  
949 LL37 absorbing kinetics (e.g., faster absorption rate) that modulate recovery of another strain  
950 during AP-treatment. In addition, a molecule (i.e., LBP) that can compete with LL37 for  
951 unintended AP-absorption may increase the antibacterial efficacy of LL37.

952 **b)** We evaluate the recovery of the bacterial population under AP treatment using the time when  
953 the population recovers to half of its maximum growth capacity within 14 hours.

954 **c)** Parameters estimated from flow cytometry data for BL21PRO and MG1655 are compared.  
955 See Methods Section M9. See Table S1 for the value of the parameters.

956 **d&e)** Two strains of *E. coli* (BP-lux and MG1655) are mixed at different ratios, where total CFU  
957 of each mixture is kept constant. **d).** Dynamic curves show the cross-bacterial-strain protection.  
958 In the presence of MG1655 (black dash and grey dash lines), the recovery times of BP-lux  
959 (which is tracked through luminescence intensity) are shifted to an earlier time compared to the  
960 one with only BP-lux (grey line). Shaded error bars are SEM from N=8. **e).** Quantified recovery  
961 times from experiment (grey bars) and simulation (red line) showing cross-bacterial-strain  
962 protection (See SI Methods Section SI-M13 for the model, and Table S1 for estimated  
963 parameters). Asterisk indicates significant difference ( $p<0.01$ ), and error bars are SEM from  
964 N=8. See Methods Section M10.

965 **f&g)** A peptide adjuvant LBP is supplemented to the culture of BP-lux during LL37 treatment.  
966 **f).** Dynamic curves show LBP perturbation. The recovery is delayed in the presence of LBP at  
967 13.5 $\mu$ g/ml (black dash line) but expedited in the presence of LBP at 3.4 $\mu$ g/ml (grey dash line)  
968 compared to the one with only BP-lux (grey line). Shaded error bars are SEM from N=8. **g).**  
969 Quantified recovery times from experiment (grey bars) and simulation (red line) (See SI  
970 Methods Section SI-M13 for the model, and Table S1 for estimated parameters). Asterisk  
971 indicates significant difference ( $p < 0.01$ ), and error bars are SEM from N=8. See Methods  
972 Section M11.
